# Supplementary material for: Crosstalk between PKCα and PI3K/AKT Signaling Is Tumor Suppressive in the Endometrium
Source: PubMed Central journal article supplement — Cell Rep. Author manuscript; Available in PMC 2018 Aug 31. (PMC6118133; doi:10.1016/j.celrep.2018.06.067), 2018-07-17
Supplement: NIHMS1502991-supplement-2.pdf [file NIHMS1502991-supplement-2.pdf]

# Crosstalk between PKC $\alpha$ and PI3K/AKT Signaling Is Tumor Suppressive in the Endometrium

## Graphical Abstract

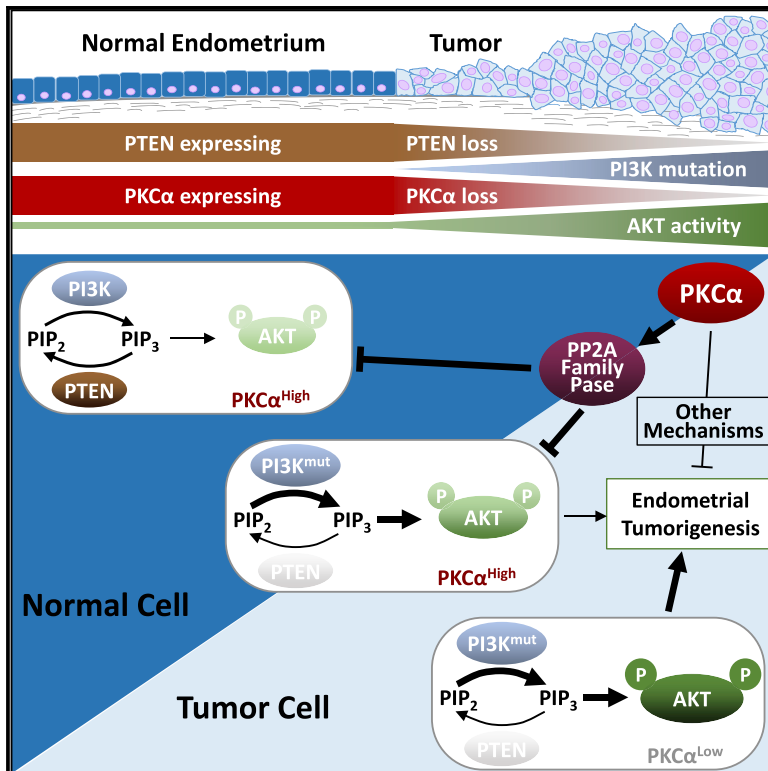

## Authors

Alice H. Hsu, Michelle A. Lum, Kang-Sup Shim, ..., Gustavo Leone, Adrian R. Black, Jennifer D. Black

## Correspondence

jennifer.black@unmc.edu

## In Brief

Hsu et al. find that PKC $\alpha$  is frequently lost in human and murine endometrial tumors and that PKC $\alpha$  deficiency enhances PI3K/AKT-driven endometrial neoplasia. PKC $\alpha$  suppresses aberrant AKT activity via a PP2A family phosphatase-dependent mechanism. Thus, PKC $\alpha$  loss appears to cooperate with PI3K/AKT perturbations to hyperactivate AKT and promote endometrial tumorigenesis.

## Highlights

- PKC $\alpha$  deficiency is a common characteristic of human and murine uterine neoplasms
- Loss of PKC $\alpha$  is rate limiting for endometrial tumorigenesis in *Pten* mutant mice
- PKC $\alpha$  suppresses AKT activity via a mechanism dependent on a PP2A family phosphatase
- Deregulation of a PKC $\alpha$ -AKT signaling axis contributes to endometrial neoplasia

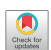

# Crosstalk between PKC $\alpha$ and PI3K/AKT Signaling Is Tumor Suppressive in the Endometrium

Alice H. Hsu,<sup>1,8</sup> Michelle A. Lum,<sup>1</sup> Kang-Sup Shim,<sup>2</sup> Peter J. Frederick,<sup>3</sup> Carl D. Morrison,<sup>4</sup> Baojiang Chen,<sup>5,9</sup> Subodh M. Lele,<sup>6</sup> Yuri M. Sheinin,<sup>6,10</sup> Takiko Daikoku,<sup>7,11</sup> Sudhansu K. Dey,<sup>7</sup> Gustavo Leone,<sup>2,12</sup> Adrian R. Black,<sup>1</sup> and Jennifer D. Black<sup>1,13,\*</sup>

<sup>1</sup>Eppley Institute for Research in Cancer and Allied Diseases, University of Nebraska Medical Center, Omaha, NE 68198, USA

<sup>2</sup>Department of Molecular Virology, Immunology, and Medical Genetics, College of Medicine, The Ohio State University, Columbus, OH 43210, USA

<sup>3</sup>Department of Gynecologic Oncology, Roswell Park Comprehensive Cancer Center, Buffalo, NY 14263, USA

<sup>4</sup>Department of Pathology and Laboratory Medicine, Roswell Park Comprehensive Cancer Center, Buffalo, NY 14263, USA

<sup>5</sup>Department of Biostatistics, University of Nebraska Medical Center, Omaha, NE 68198, USA

<sup>6</sup>Department of Pathology and Microbiology, University of Nebraska Medical Center, Omaha, NE 68198, USA

<sup>7</sup>Division of Reproductive Sciences, Cincinnati Children's Hospital Medical Center, Cincinnati, OH 45229, USA

<sup>8</sup>Present address: Laboratory of Cell and Development Signaling, National Cancer Institute-Frederick, Frederick, MD 21702, USA

<sup>9</sup>Present address: Department of Biostatistics and Data Science, School of Public Health, The University of Texas Health Science Center at Houston, Austin Regional Campus, Austin, TX 78701, USA

<sup>10</sup>Present address: Department of Laboratory Medicine and Pathology, University of Minnesota School of Medicine, Minneapolis, MN 55455, USA

<sup>11</sup>Present address: Division of Transgenic Animal Science, Institute for Experimental Animals, Kanazawa University, Kanazawa 920-8640, Japan

<sup>12</sup>Present address: Hollings Cancer Center, Medical University of South Carolina, Charleston, SC 29425, USA

<sup>13</sup>Lead Contact

\*Correspondence: [jennifer.black@unmc.edu](mailto:jennifer.black@unmc.edu)  
<https://doi.org/10.1016/j.celrep.2018.06.067>

## SUMMARY

Protein kinase C (PKC) isozymes are commonly recognized as oncoproteins based on their activation by tumor-promoting phorbol esters. However, accumulating evidence indicates that PKCs can be inhibitory in some cancers, with recent findings propelling a shift in focus to understanding tumor suppressive functions of these enzymes. Here, we report that PKC $\alpha$  acts as a tumor suppressor in PI3K/AKT-driven endometrial cancer. Transcriptional suppression of PKC $\alpha$  is observed in human endometrial tumors in association with aggressive disease and poor prognosis. In murine models, loss of PKC $\alpha$  is rate limiting for endometrial tumor initiation. PKC $\alpha$  tumor suppression involves PP2A-family-dependent inactivation of AKT, which can occur even in the context of genetic hyperactivation of PI3K/AKT signaling by coincident mutations in *PTEN*, *PIK3CA*, and/or *PIK3R1*. Together, our data point to PKC $\alpha$  as a crucial tumor suppressor in the endometrium, with deregulation of a PKC $\alpha$ →PP2A/PP2A-like phosphatase signaling axis contributing to robust AKT activation and enhanced endometrial tumorigenesis.

## INTRODUCTION

Protein kinase C (PKC) serine/threonine kinases are a family of signaling intermediates that act downstream of cell-surface receptors and the second messenger diacylglycerol to control

multiple cellular responses, including proliferation, differentiation, migration, survival, and tumorigenesis (Black and Black, 2013; Garg et al., 2014). The identification of PKC as the major cellular receptor for tumor promoting phorbol esters provided the first link between these kinases and cancer (Castagna et al., 1982). In the years following this discovery, research focused on the oncogenic properties of PKCs, and considerable effort was dedicated to their development as therapeutic targets (Mochly-Rosen et al., 2012). However, it has become increasingly apparent that there is significant complexity in the roles of PKC isozymes in tumorigenesis (Garg et al., 2014). The PKC family consists of ten isozymes divided into three classes based on differences in structure and regulation: conventional or classical PKCs (cPKCs;  $\alpha$ ,  $\beta$ I,  $\beta$ II, and  $\gamma$ ), novel PKCs (nPKCs;  $\delta$ ,  $\epsilon$ ,  $\eta$ , and  $\theta$ ) and atypical PKCs (aPKCs;  $\zeta$  and  $\lambda$ /I). While there is strong evidence for pro-oncogenic functions of some PKCs (e.g., PKC $\epsilon$  and PKC $\iota$ ), studies from our laboratory and others have demonstrated antiproliferative and tumor-suppressive activity of these kinases in several systems (Garg et al., 2014; Pysz et al., 2009; Hill et al., 2014; Oster and Leitges, 2006; Black, 2001). A tumor-suppressive role of PKCs was further highlighted by a recent comprehensive analysis of cancer-associated PKC mutations, which showed that 28 of 46 mutations tested led to loss of kinase function (Antal et al., 2015). Much of the complexity regarding the involvement of PKCs in cancer arises from their pleiotropic and context-dependent effects on cellular function. Contradictory data on PKC isozyme levels in tumors, combined with the use of a limited number of cell lines to assess PKC isozyme function and a lack of correlation between *in vitro* and *in vivo* data, have added to the confusion (Garg et al., 2014). Thus, understanding of the roles of PKCs in tumorigenesis will require comprehensive

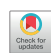

and coordinated *in vivo* and *in vitro* studies of individual isozymes in a specific cancer type.

Endometrial cancer (EC) is the most common gynecological malignancy in the United States, with an estimated 61,380 new cases and 10,920 deaths in 2017 (Siegel et al., 2017). With an overall 5-year survival rate of >80%, EC has attracted less public attention than other cancers. However, advanced and recurrent disease is refractory to treatment, and the prognosis for these patients is dismal, with survival estimates of less than 1 year (Engelsen et al., 2009). Because of its high incidence, EC is the sixth leading cause of cancer death in women, accounting for more deaths than melanoma, cervical cancer, glioblastoma, all lymphomas, or all leukemias (Siegel et al., 2017). Alarming, the incidence and mortality for EC are on the rise, with a >50% increase since 2005. Since obesity is a major risk factor for the disease (Fader et al., 2009), EC will become an even greater health concern as the effects of increased societal obesity become evident in coming years.

EC has historically been classified into two histopathological subtypes. Type I tumors (85%–90% of cases) are of endometrioid histology, while type II non-endometrioid tumors are predominantly of serous histology (Suarez et al., 2017). Recent genomic analysis has recognized four molecular subgroups (*POLE* ultramutated, microsatellite instability hypermutated, copy number low, and copy number high) that are distinct from their histological classification (Kandoth et al., 2013). A common feature of these subgroups is the prevalence of mutations in the phosphatidylinositol 3-kinase (PI3K)/AKT signaling pathway (Dedes et al., 2011; Hong et al., 2015). Activation of PI3K by growth factor receptors generates phosphatidylinositol-3,4,5-trisphosphate (PIP<sub>3</sub>), which recruits AKT to the plasma membrane, where it is phosphorylated and activated by PDK1 (T308) and mTORC2 (S473) (Manning and Toker, 2017). AKT directly or indirectly inactivates inhibitors of cell-cycle progression, survival, glycolysis, angiogenesis, and translation (e.g., p27, FOXO1, BAD, and 4E-BP1), thus unlocking key processes involved in oncogenesis (Manning and Toker, 2017). PI3K/AKT signaling is negatively regulated by the tumor suppressor PTEN, a lipid phosphatase that opposes the activity of PI3K by dephosphorylating PIP<sub>3</sub> (Manning and Toker, 2017; Georgescu, 2010). The most common alterations in EC are loss-of-function mutations in *PTEN* and mutation or amplification of the catalytic subunit of PI3K, *PIK3CA* (Dedes et al., 2011; Hong et al., 2015). Mutations in *PIK3R1*, the regulatory subunit of PI3K, *AKT*, or factors that crosstalk with PI3K/AKT signaling, such as *KRAS* and *EGFR*, are also observed. The importance of PI3K/AKT pathway alterations in uterine tumorigenesis is highlighted by the increased incidence of EC in Cowden syndrome patients, who carry germline mutations in *PTEN* (Hollander et al., 2011), and the predisposition of mice with deletion or loss-of-function mutations in *Pten* to uterine neoplasia (Podsypanina et al., 1999; Stambolic et al., 2000). Notably, alterations in PI3K/AKT pathway components are not mutually exclusive in EC, with multiple mutations frequently coexisting at higher than predicted rates (Oda et al., 2005). The association between accumulation of multiple pathway mutations and tumor progression, combined with the sensitivity of EC cells to PI3K/AKT pathway inhibition (Hayes et al., 2006; Weigelt et al., 2013), indicates that strong hyperac-

tivation of PI3K/AKT signaling is critical for driving EC tumorigenesis. A better understanding of the dysregulation of PI3K/AKT signaling in EC may, therefore, point to new therapeutic targets for this disease.

PKC $\alpha$  is a ubiquitously expressed PKC isozyme that has been implicated in control of cell proliferation, differentiation, survival, and motility (Garg et al., 2014). The effects of this kinase appear to be context dependent, with evidence for tumor-suppressive (e.g., in colorectal, lung, and basal cell cancers) and tumor-promoting (glioma and breast cancers) activity in different tumor types (Pysz et al., 2009; Oster and Leitges, 2006; Neill et al., 2003; Hill et al., 2014; Tam et al., 2013; Cameron et al., 2008). Using patient samples, animal models, and a panel of human EC cell lines, our in-depth studies show that PKC $\alpha$  plays a key tumor-suppressive role in the endometrial epithelium that is at least partially mediated by its ability to suppress the PI3K/AKT signaling pathway.

## RESULTS

### Loss of PKC $\alpha$ Expression Is Associated with High-Grade EC

As a first step toward understanding the role of PKC $\alpha$  signaling in EC, we used immunohistochemistry (IHC) to profile its expression in a panel of 436 human endometrial tumors (330 endometrioid and 106 non-endometrioid) in tissue microarray (TMA) format. While PKC $\alpha$  was detected in normal secretory and proliferative endometrium, the enzyme was absent or markedly reduced in >60% of endometrioid ECs and >50% of all non-endometrioid tumors, with the proportion of PKC $\alpha$ -deficient tumors ranging from 31% of malignant mixed Mullerian tumors (MMMT) to 70% of clear cell ECs (Figures 1A and 1B). The availability of frozen tissue for a subset of these ECs allowed parallel quantification of PKC $\alpha$  mRNA by qRT-PCR. A significant correlation was noted between PKC $\alpha$  mRNA and protein levels (Figure 1C), indicating that downregulation of PKC $\alpha$  protein in human EC is controlled primarily at the level of mRNA expression. Analysis of The Cancer Genome Atlas (TCGA) data confirmed that PKC $\alpha$  mRNA is markedly downregulated in human ECs ( $p = 2.77e^{-9}$ ) (and pointed to altered expression of several additional PKC family members in these tumors) (Figure S1A).

To further examine the regulation of PKC $\alpha$  in EC, we determined its expression in a panel of 16 well-characterized human EC cell lines (Table S1) (Weigelt et al., 2013). Six of these cell lines expressed markedly reduced levels of PKC $\alpha$  (Figures 1D and 1E), and a significant correlation was observed between PKC $\alpha$  protein and mRNA levels across the panel of EC cell lines (Figure 1C). To test for changes in mRNA transcription, RNA was pulse-labeled with 5-ethynyluridine (EU) in two PKC $\alpha$ <sup>high</sup> (HEC-1-B; HEC-50Co) and two PKC $\alpha$ <sup>low</sup> (RL95-2; Ishikawa) EC cell lines. PKC $\alpha$ <sup>low</sup> cells incorporated markedly lower amounts of EU into PKC $\alpha$  mRNA than PKC $\alpha$ <sup>high</sup> cells, with the extent of labeling closely paralleling the differences in overall levels of PKC $\alpha$  mRNA in the cells (Figure 1F). Together, these data confirm that PKC $\alpha$  is downregulated in a significant fraction of human ECs and EC cell lines and that PKC $\alpha$  deficiency primarily reflects a reduction in the transcription rate of the PKC $\alpha$  gene.

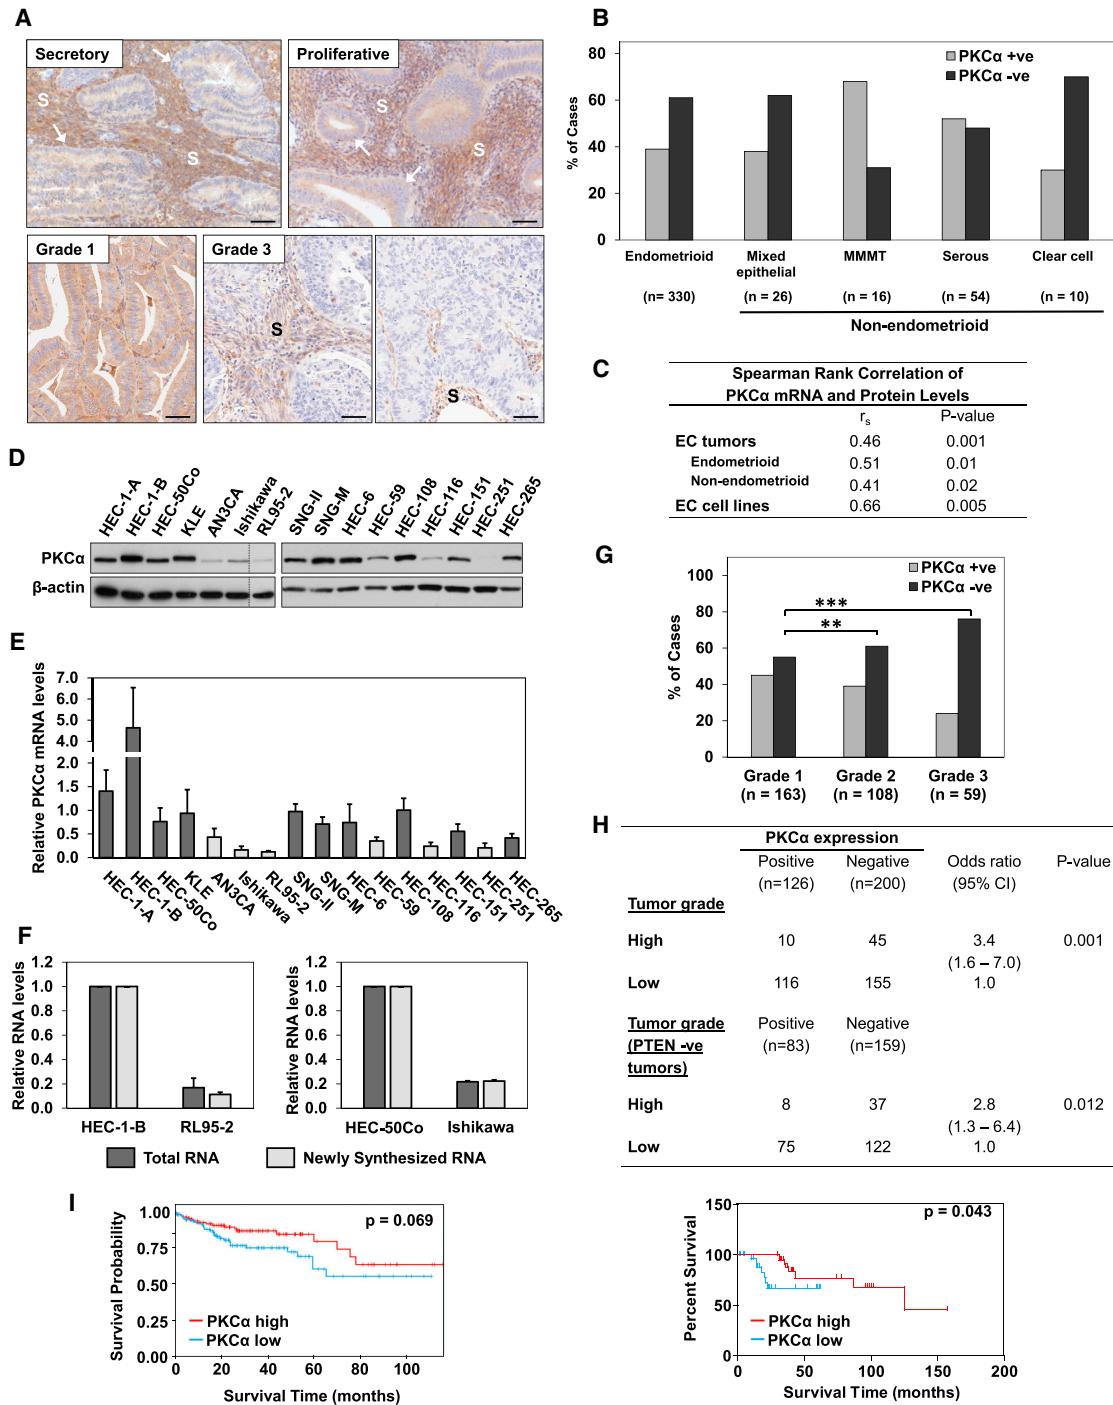

**Figure 1. PKC $\alpha$  Expression Is Lost in EC**

(A) IHC analysis of PKC $\alpha$  in normal human secretory and proliferative endometrium (arrows), a PKC $\alpha$ -retaining grade 1 endometrioid tumor, and grade 3 endometrioid tumors lacking PKC $\alpha$ . PKC $\alpha$  signal in the stroma (S) serves as a positive control for IHC staining. Scale bars, 100  $\mu$ m.  
 (B) PKC $\alpha$  expression status (IHC staining) in EC histological subtypes.  
 (C) Correlation between PKC $\alpha$  mRNA (qRT-PCR) and protein (IHC) levels in 26 endometrioid and 26 non-endometrioid tumors and 16 EC cell lines.  
 (D and E) PKC $\alpha$  protein (immunoblot [IB]) (D) and mRNA (qRT-PCR normalized against 18 S rRNA) (E) levels in EC cell lines. Vertical line indicates rearrangement of lanes from a single membrane for clarity. Dark bars, PKC $\alpha$ <sup>high</sup>; light bars, PKC $\alpha$ <sup>low</sup>.  
 (F) PKC $\alpha$  mRNA expression and synthesis (EU-labeling) in PKC $\alpha$ <sup>high</sup> and PKC $\alpha$ <sup>low</sup> EC cells (normalized against GAPDH mRNA).  
 (G) PKC $\alpha$  expression status in endometrioid ECs of different grades.

(legend continued on next page)



Further analysis of the TMA data revealed a positive correlation between decreased levels of PKC $\alpha$  and disease aggressiveness in the endometrioid EC subtype, with 56% of grade 1, 61% of grade 2, and 76% of grade 3 lesions showing loss of the enzyme (Figure 1G). A significant association was also observed between loss of PKC $\alpha$  and risk of high-grade endometrioid disease (odds ratio [OR] = 3.4) (Figure 1H, table). PKC $\alpha$  deficiency also correlated with disease severity when only PTEN negative endometrioid tumors were considered (OR = 2.8), indicating that PKC $\alpha$  loss is a risk factor for aggressiveness in human EC even in the presence of activating mutations in the PI3K/AKT pathway. Consistent with this conclusion, low PKC $\alpha$  expression was indicative of reduced survival in patients with endometrioid EC (Figure 1H, graph). Similarly, reverse phase protein array analysis of 244 EC cases (~80% endometrioid; Liang et al., 2012) from The Cancer Proteome Atlas (TCPA) showed that PKC $\alpha$  expression trends with enhanced survival of EC patients (Figure 1I). In contrast, the expression of other PKC isozymes either showed no association with survival or correlated with a less favorable prognosis (e.g., PKC $\epsilon$  and PKC $\iota$ ; Figure S1). Collectively, the data show that loss of PKC $\alpha$  can be an early event in EC and that PKC $\alpha$  deficiency is associated with more aggressive disease, pointing to a potential tumor-suppressive function of PKC $\alpha$  signaling in the endometrium.

### PKC $\alpha$ Expression Is Lost in Mouse Models of Endometrial Neoplasia

Next, we characterized PKC $\alpha$  expression in tissues from mouse models of endometrial neoplasia. In the normal murine endometrium, PKC $\alpha$  was detectable in all four phases of the estrous cycle (Figure S2; data not shown). PKC $\alpha$  expression was relatively low and predominantly cytoplasmic in metestrus, diestrus, and early proestrus. However, endometrial glands showed robust expression and plasma membrane association of PKC $\alpha$  in late proestrus and estrus (arrows). The proestrus-to-estrus transition was also accompanied by increased expression and strong plasma membrane translocation of PKC $\alpha$  in a majority of cells of the luminal epithelial compartment (Figure S2, arrows). Since membrane association is indicative of PKC activation (Black and Black, 2013), these data suggest that PKC $\alpha$  is predominantly active during late proestrus and estrus phases. Membrane-associated PKC $\alpha$  generally coincided with reduced staining for the proliferation marker Ki67 (Figure S3, arrows), with cytoplasmic PKC $\alpha$  staining coinciding with stronger Ki67 signal in both proestrus and estrus (Figure S3, arrowheads). These results, which were confirmed by immunofluorescence analysis of frozen uterine tissues (Figure S2), suggest that PKC $\alpha$  may be involved in antiproliferative signaling in the endometrium and are thus consistent with a tumor-suppressive function of the enzyme in this tissue.

The expression of PKC $\alpha$  in endometrial lesions was explored in mice with single-allele knockin of *Pten* mutations seen in Cowden syndrome (frameshift/truncation *Pten* <sup>$\Delta 4-5/+$</sup>  mutation,

and missense *Pten*<sup>G129E/+</sup> or *Pten*<sup>C124R/+</sup> mutations). These mice develop endometrial hyperplasia with high penetrance upon loss of expression of the wild-type (WT) *Pten* allele (Figure 2; Wang et al., 2010). Loss of the WT allele is reflected in absence of PTEN staining in *Pten* <sup>$\Delta 4-5/+$</sup>  lesions and a reduction in PTEN staining in *Pten*<sup>G129E/+</sup> or *Pten*<sup>C124R/+</sup> lesions (Figures 2A–2C). As expected, loss of PTEN function was accompanied by a marked increase in AKT activity, as indicated by enhanced pAKT<sup>Ser473</sup> signal. Remarkably, these lesions uniformly lacked PKC $\alpha$  protein expression, with a perfect correspondence between PTEN deficiency, AKT activation, and PKC $\alpha$  loss (arrows and boxed areas). The reduced levels of PKC $\alpha$  protein were associated with decreased mRNA expression, as revealed by qRT-PCR analysis of normal and tumor tissues obtained by laser capture microdissection (LCM) (Figures 2E and S4). Interestingly, the lesions also expressed increased levels of inhibitor of DNA binding 1 (Id1), a gene known to be suppressed by PKC $\alpha$  signaling (Figure S5) (Hao et al., 2011). PKC $\alpha$  loss was also observed in uterine tumors of mice with *cre*-mediated conditional endometrial deletion of *Pten* in the epithelium and stroma (*Pten*<sup>Pr-/-</sup>) or the epithelium alone (*Pten*<sup>lf-/-</sup>) regulated by the progesterone receptor promoter or the lactoferrin promoter, respectively (Figure 2F) (Daikoku et al., 2008, 2014). The loss of PKC $\alpha$  in multiple *in vivo* models of PI3K/AKT-driven endometrial neoplasia further supports a role for PKC $\alpha$  deficiency in uterine tumorigenesis.

### PKC $\alpha$ Deficiency in EC Is Not a Direct Result of PTEN Loss/AKT Activation and Does Not Appear to Drive Loss of PTEN Expression

To determine if PKC $\alpha$  deficiency in EC is a direct consequence of PTEN loss of function/AKT activation, PTEN was stably knocked down in three PTEN WT, PKC $\alpha$ <sup>high</sup> human EC cell lines (Figure 3A). While the functional consequences of PTEN knockdown were confirmed by increased AKT phosphorylation, loss of PTEN did not affect the levels of PKC $\alpha$  (or of any other PKC isozyme) (Figure 3B). Similarly, inhibition of aberrant AKT activity in PTEN mutant/PKC $\alpha$ <sup>low</sup> EC cell lines by restoration of PTEN expression (Figure 3C) or treatment with AKT or PI3K inhibitors (MK-2206 or LY294002, respectively) (Figure 3D) failed to affect PKC $\alpha$  levels. Collectively, these data indicate that PKC $\alpha$  deficiency is not simply a passenger event downstream of PI3K/AKT hyperactivation and suggest that loss of the enzyme may contribute directly to endometrial tumor development. To test the possibility that PKC $\alpha$  deficiency drives loss of PTEN in endometrial cells, we explored the effects of PKC $\alpha$  knockdown in PTEN WT, PKC $\alpha$ <sup>high</sup> EC cell lines. As shown in Figure 3E, PKC $\alpha$  knockdown failed to affect PTEN levels in these cells.

### PKC $\alpha$ Inhibits Endometrial Tumorigenesis *In Vivo* and *In Vitro*

To directly examine the effects of PKC $\alpha$  deficiency on endometrial tumor development, we generated *Prkca*<sup>+/-</sup>; *Pten* <sup>$\Delta 4-5/+$</sup>  and

(H) PKC $\alpha$  status is an indicator of risk for high-grade disease (table) and survival of patients with endometrioid tumors (graph). Grade 1 and 2 tumors are considered low grade, and grade 3 tumors are high grade.

(I) Survival probability of EC patients in TCPA endometrial dataset with high and low PKC $\alpha$  protein expression.

\*\*p < 0.01, \*\*\*p < 0.005 (2-sided Fisher's exact test). Error bars represent SEM (n = 3 biological replicates, except in F [n = 2 biological replicates]).

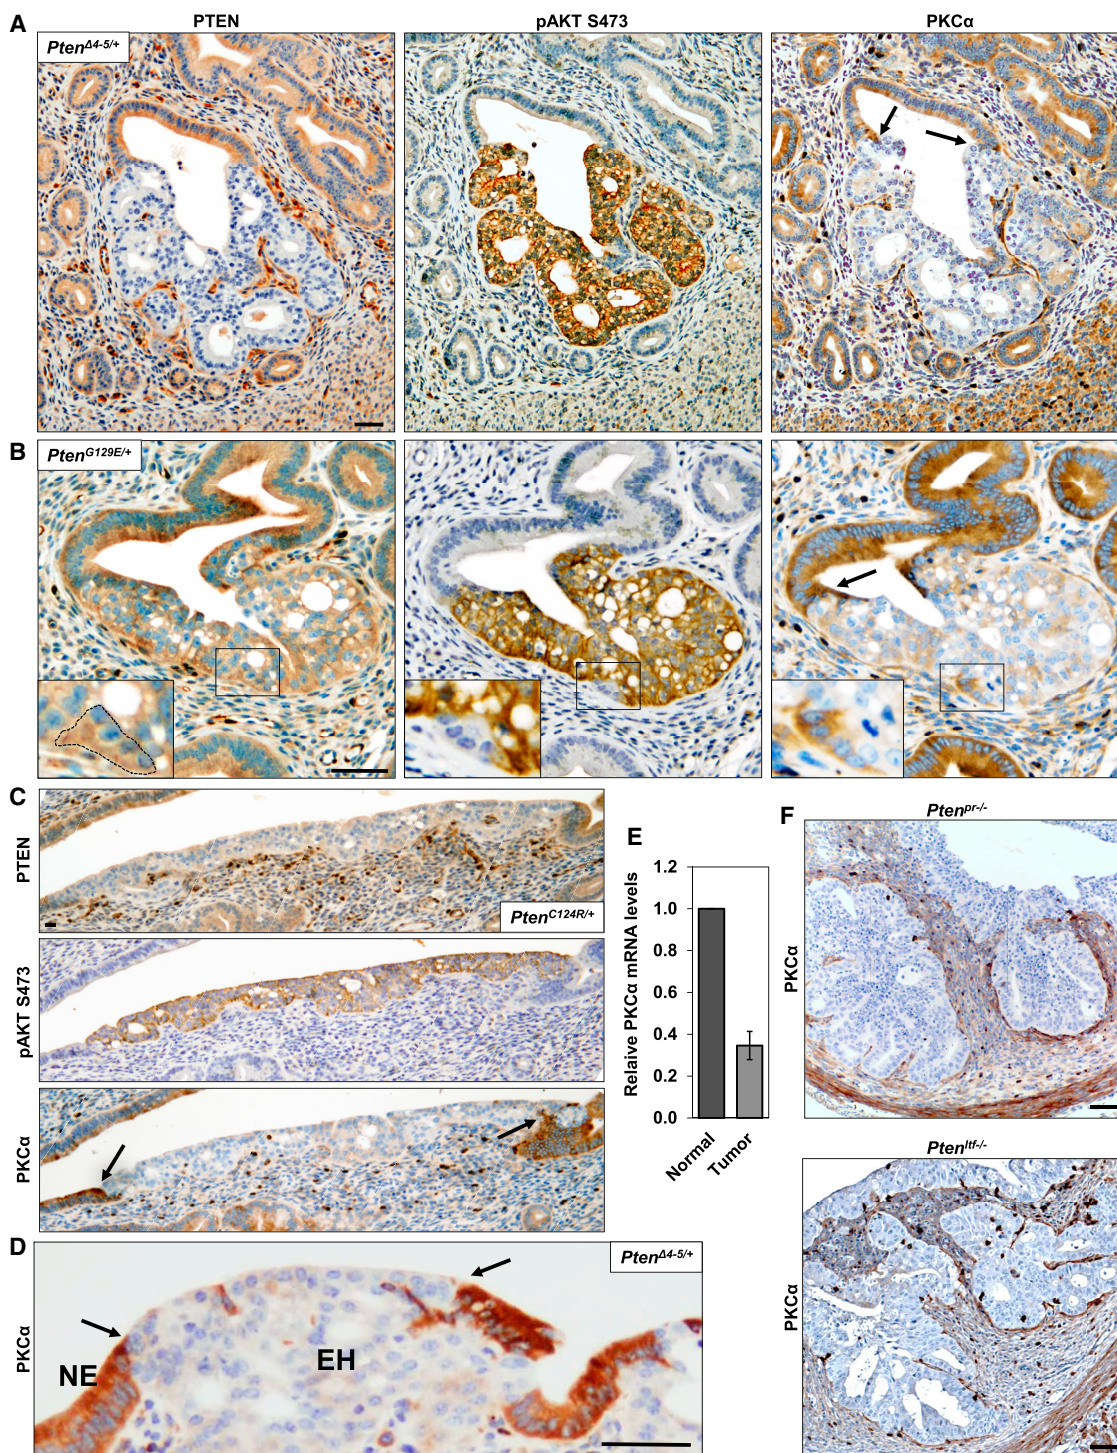

**Figure 2. PKC $\alpha$  Expression Is Lost in Mouse Models of Endometrial Neoplasia**

(A–D and F) IHC analysis of PTEN, pAKT, and PKC $\alpha$  expression in consecutive sections of uterine lesions arising in mutant *Pten* allelic-knockin mice (*Pten*<sup>Δ4-5/+</sup> [A and D], *Pten*<sup>G129E/+</sup> [B], and *Pten*<sup>C124R/+</sup> [C]) and conditional *Pten*-knockout mice (F). Arrows indicate boundary between normal endometrial tissue (NE) and endometrial hyperplasia (EH). Inserts in (B) show a higher magnification of boxed areas; note the correspondence between a WT PTEN retaining region delineated by a dotted line, the absence of pAKT, and retention of PKC $\alpha$ . Scale bars, 50  $\mu$ m.

(E) PKC $\alpha$  mRNA expression (normalized against GAPDH) in normal and neoplastic uterine tissue collected from *Pten*<sup>Δ4-5/+</sup> mice by LCM.



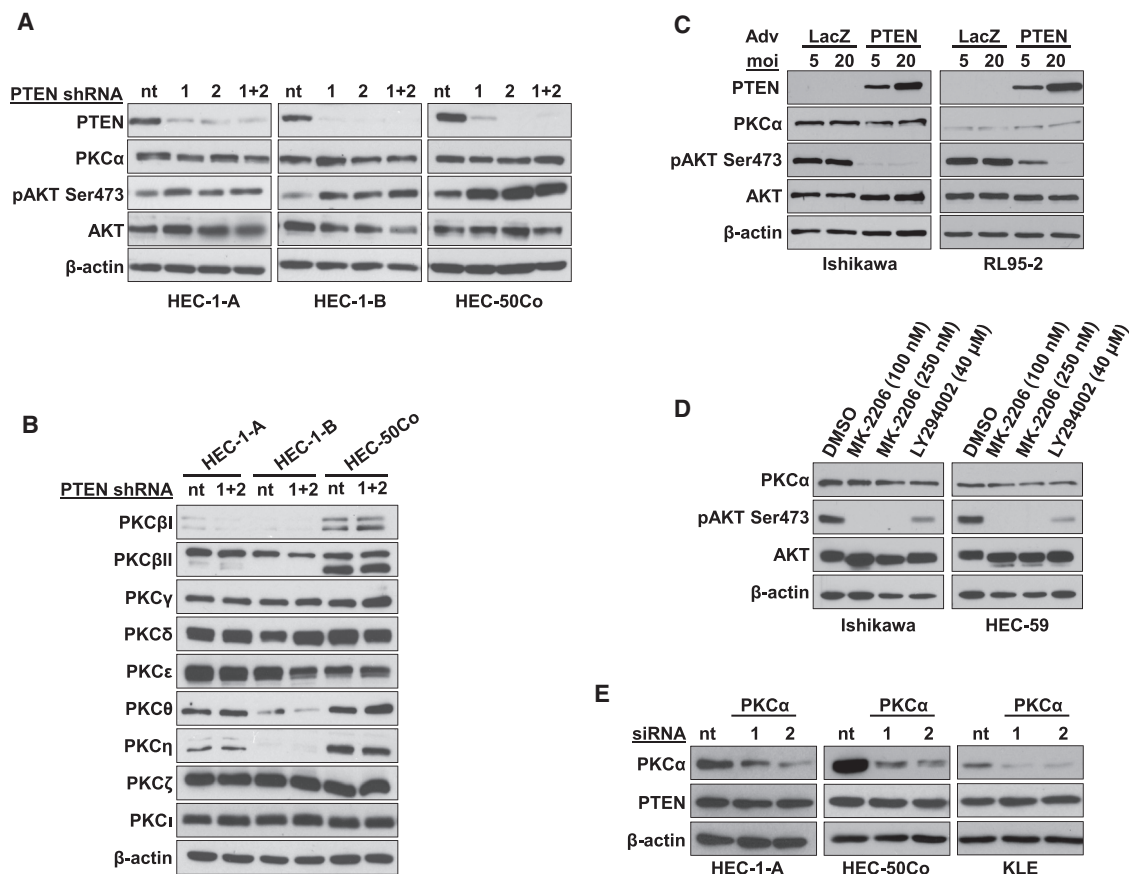

**Figure 3. PKC $\alpha$  Deficiency in EC Is Not a Direct Result of PTEN Loss/AKT Activation and Does Not Promote PTEN Loss**

(A and B) IB analysis of indicated proteins in EC cells expressing two different PTEN shRNAs (1 and 2) or non-targeting shRNA (nt).

(C) IB analysis of PTEN-null EC cells with restored PTEN expression.

(D) IB analysis of EC cells treated with AKT inhibitor MK-2206 or PI3K inhibitor LY294002.

(E) IB analysis of PTEN in PKC $\alpha$ -knockdown EC cells.

Data are representative of 3 biological replicates.

*Prkca*<sup>-/-</sup>; *Pten* <sup>$\Delta 4-5/+$</sup>  mice. Uterine tissue was collected at 1, 3, 5, 7, and 9 months, and hyperplastic lesions were identified by pAKT<sup>Ser473</sup> staining and histopathological analysis (Wang et al., 2002) (Figure 4A, top and middle panels). Quantification of the proportion of pAKT positive endometrium pointed to a statistically significant 3-fold increase in tumor burden in PKC $\alpha$ <sup>-/-</sup> animals at both 1 and 3 months compared with PKC $\alpha$ <sup>+/+</sup> littermate controls (Figure 4A). However, this difference diminished at later times. Blinded histological analysis of H&E-stained sections by a pathologist (Y.M.S.) confirmed this conclusion (not shown). Since hyperplastic lesions arising in *Prkca*<sup>+/-</sup>; *Pten* <sup>$\Delta 4-5/+$</sup>  mice uniformly lacked PKC $\alpha$  (Figure 2), the increased tumor burden in *Prkca*<sup>-/-</sup>; *Pten* <sup>$\Delta 4-5/+$</sup>  mice indicates that PKC $\alpha$  loss is a rate-limiting step in endometrial tumorigenesis in this model.

To test the effects of PKC $\alpha$  on the transformed phenotype of human EC cells, PKC $\alpha$  expression was restored in PKC $\alpha$ <sup>low</sup> cell lines by adenoviral transduction or silenced in PKC $\alpha$ <sup>high</sup> cells using siRNA, and anchorage-independent growth was assessed by colony formation in soft agarose.

Exogenous PKC $\alpha$  markedly inhibited colony formation of PKC $\alpha$ <sup>low</sup> EC cells, and colonies that did form were substantially smaller than those of LacZ-transduced cells (Figure 4B). One infection unit/cell (MOI) of PKC $\alpha$  adenovirus was sufficient to suppress anchorage-independent growth of these cells (Figure 4C), pointing to strong tumor-suppressive activity of PKC $\alpha$  in human EC cells. The requirement for PKC $\alpha$  kinase activity in these effects was tested using kinase-dead enzyme (KD-PKC $\alpha$ ). Since KD-PKC $\alpha$  is unstable in cells (Pysz et al., 2009), 25 or 50 MOI KD-PKC $\alpha$  adenovirus was used to ensure levels of mutant protein expression comparable with WT PKC $\alpha$  at 1 MOI. KD-PKC $\alpha$  failed to affect colony formation, even at the highest level of expression (Figure 4C). The effects of PKC $\alpha$  knockdown were examined in PKC $\alpha$ <sup>high</sup> HEC-6 cells, which grow less efficiently in soft agarose than other EC cells in our panel. Notably, PKC $\alpha$  depletion led to an ~2-fold increase in colony formation of these cells (Figure 4D). Thus, PKC $\alpha$  kinase activity is a potent inhibitor of the transformed phenotype of human EC cells.

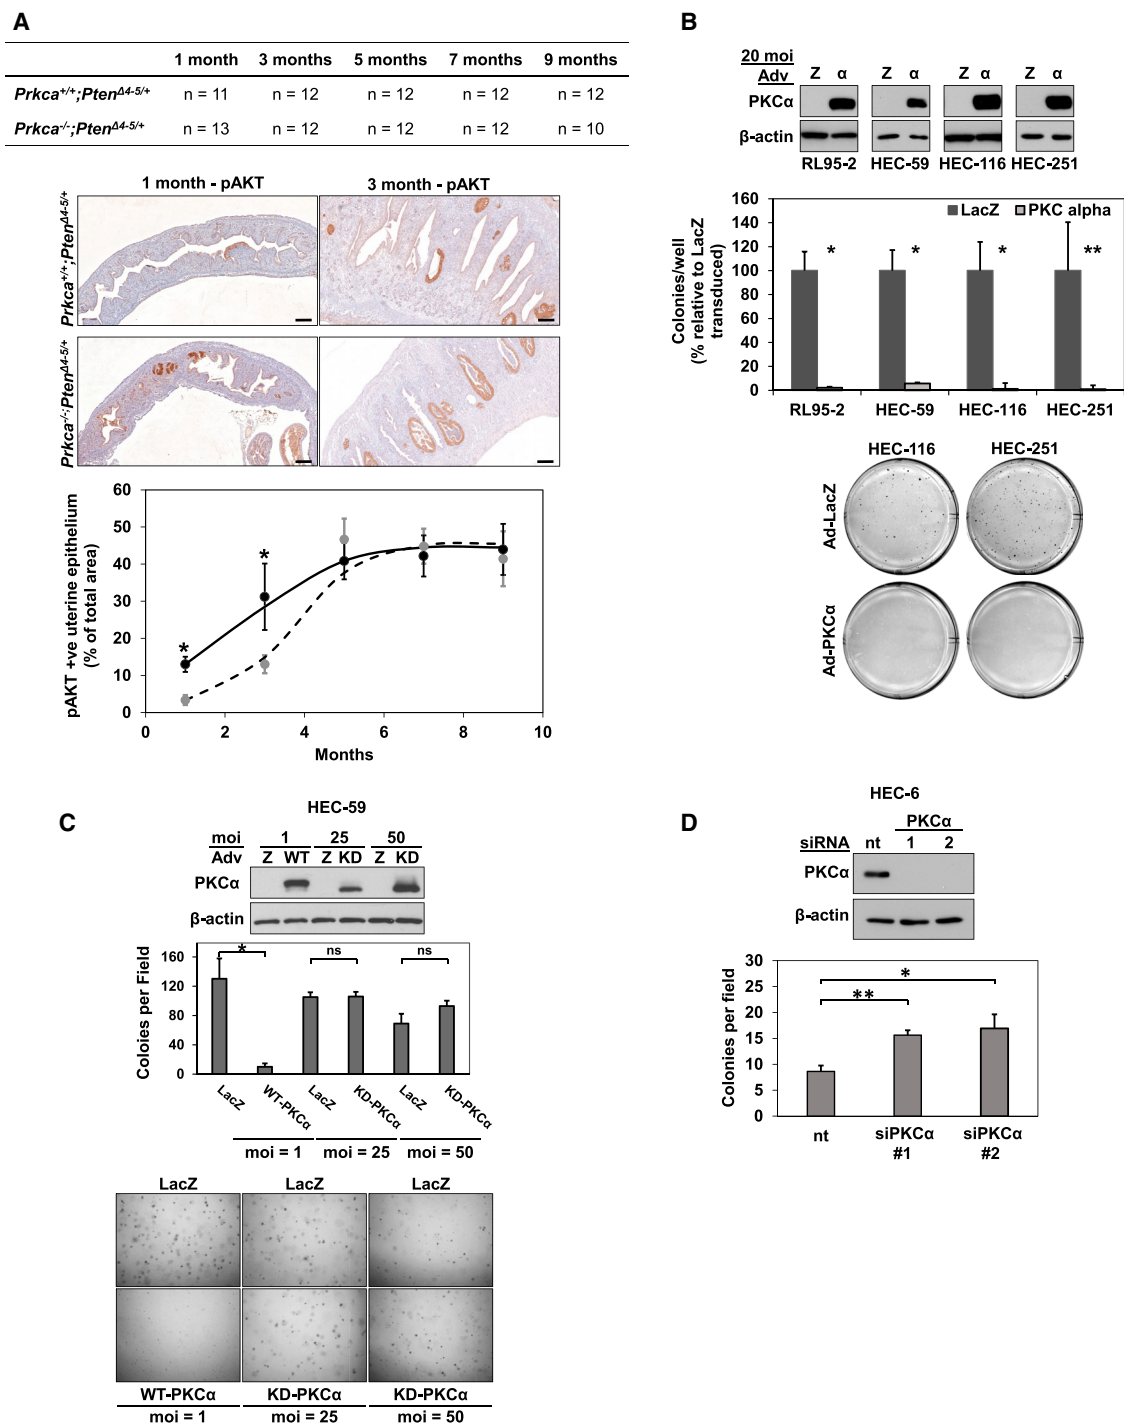

**Figure 4. PKC $\alpha$  Inhibits Endometrial Tumorigenesis *In Vivo* and *In Vitro***

(A) Quantification of relative levels of hyperplastic uterine epithelium identified by pAKT<sup>S473</sup> staining, as shown in representative images at 1 and 3 months. Dotted line, *Prkca*<sup>+/+</sup>;*Pten*<sup>Δ4-5/+</sup>; solid line, *Prkca*<sup>-/-</sup>;*Pten*<sup>Δ4-5/+</sup>. Scale bars, 200  $\mu$ m.

(B) IB analysis and anchorage-independent growth (colony formation in soft agar) of PKC $\alpha$ <sup>low</sup> EC cells transduced with 20 MOI adenovirus expressing LacZ or PKC $\alpha$ .

(C) Anchorage-independent growth of HEC-59 cells transduced with WT-PKC $\alpha$ - or KD-PKC $\alpha$ . The higher mobility of KD-PKC $\alpha$  in the IB reflects absence of priming phosphorylation (Pysz et al., 2009).

(D) Anchorage independent growth of HEC-6 cells transfected with two different PKC $\alpha$  siRNAs (1 and 2) or nt siRNA.

\*p < 0.05; \*\*p < 0.01; ns, not significant. Error bars represent SEM for each animal cohort in (A) or 3 biological replicates in (B)–(D).

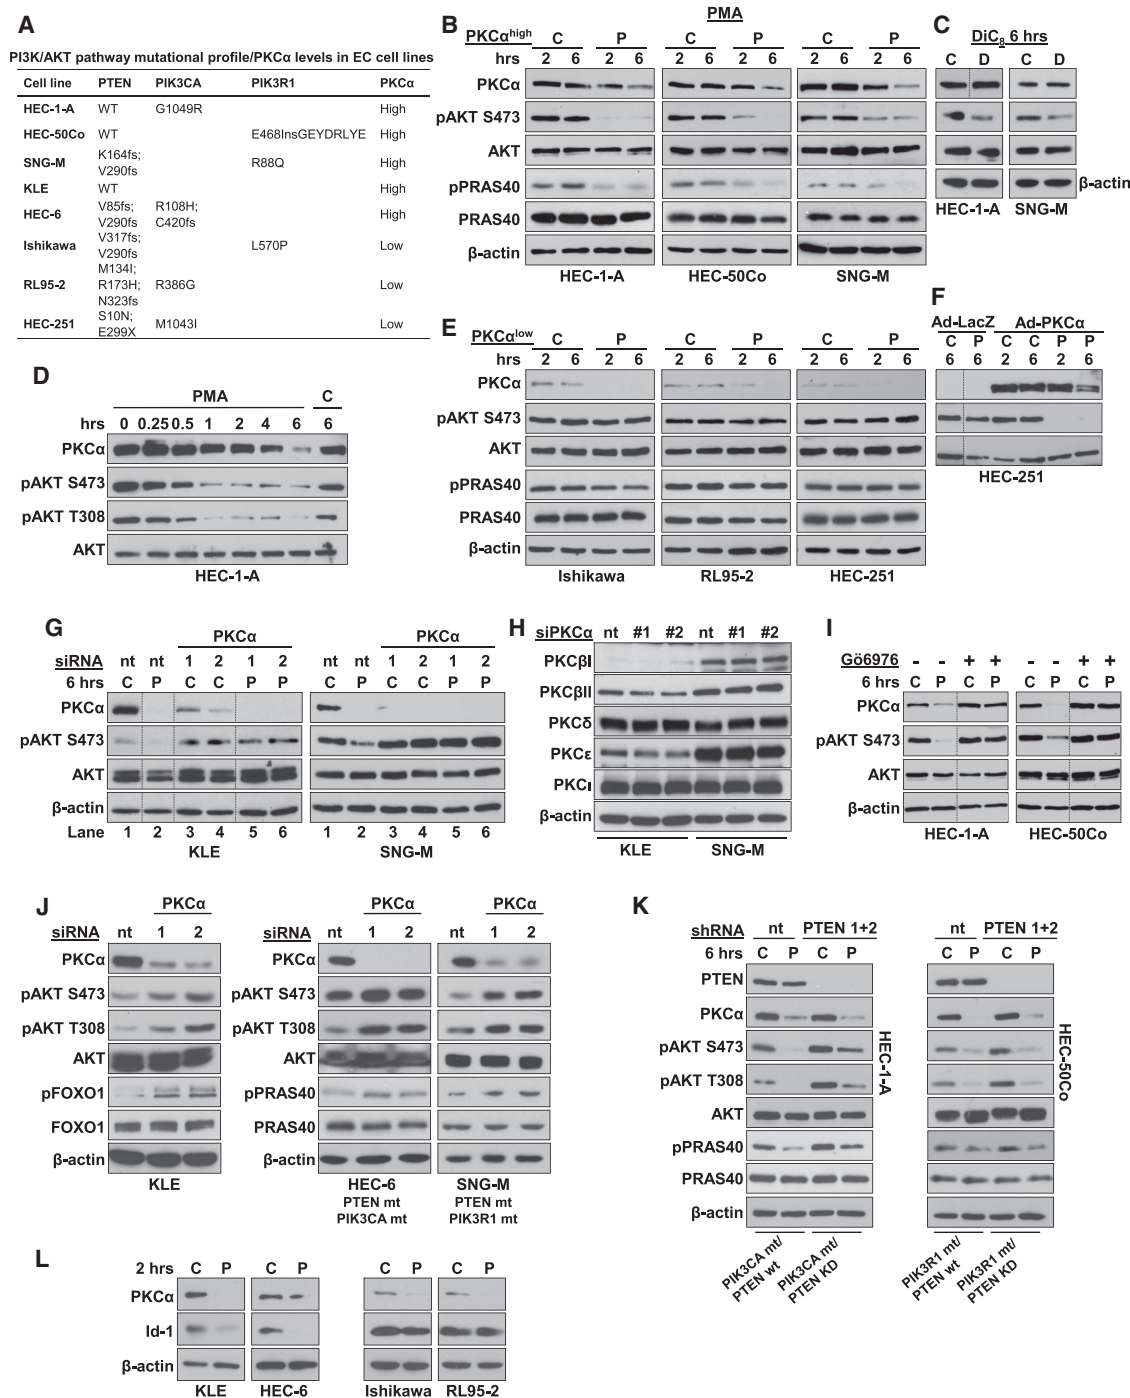

**Figure 5. PKC $\alpha$  Activity Inhibits PI3K/AKT Signaling in EC Cells**

(A) PI3K/AKT pathway mutations and PKC $\alpha$  expression in EC cell lines.

(B–D) IB analysis of PKC $\alpha$ <sup>high</sup> EC cells treated with PMA for 2 or 6 hr (B), DiC<sub>8</sub> for 6 hr (C), or PMA for various times as indicated (D). C, vehicle control; D, DiC<sub>8</sub>; P, PMA.

(E and F) IB analysis of PKC $\alpha$ <sup>low</sup> EC cells (E), or HEC-251 cells transduced with 1 MOI of LacZ or PKC $\alpha$  adenovirus (F), treated with PMA.

(G) PKC $\alpha$ <sup>high</sup> EC cells transfected with nt or PKC $\alpha$  siRNAs (1, 2) and subjected to PMA treatment.

(H) PKC isozyme expression in PKC $\alpha$ -knockdown EC cells.

(I) EC cells pretreated with Gö6976 (2.5  $\mu$ M, 30 min) to inhibit classical PKCs prior to addition of PMA.

(J) Induction of pAKT activity in PKC $\alpha$ -knockdown EC cells.

(K) PMA treatment of EC cells with stable expression of nt or PTEN shRNA.

(legend continued on next page)



### PKC $\alpha$ Activity Inhibits PI3K/AKT Signaling in EC Cells via a PHLPP-1/2-Independent, PP2A-Family-Dependent Mechanism

Since a majority of ECs are highly dependent on PI3K/AKT signaling (Weigelt et al., 2013), we next examined the effects of PKC $\alpha$  activity on this pathway using a panel of human EC cell lines harboring different PI3K/AKT pathway mutations (Figure 5A). Treatment with the PKC agonists phorbol 12-myristate 13-acetate (PMA) or the short-chain diacylglycerol 1,2-dioctanoylglycerol (DiC<sub>8</sub>) markedly decreased AKT activity in PKC $\alpha$ <sup>high</sup> cells (Figures 5B and 5C), as indicated by reduced levels of pAKT<sup>Ser473</sup> and decreased phosphorylation of the AKT substrate PRAS40. Full activation of AKT requires phosphorylation at S473 and T308 residues, and both of these residues are targeted by PKC activation in EC cells (Figure 5D). While PKC agonists failed to affect AKT phosphorylation in PKC $\alpha$ <sup>low</sup> cells (Figure 5E), adenoviral restoration of PKC $\alpha$  rescued the effect (Figure 5F). In contrast, knockdown of PKC $\alpha$  in PKC $\alpha$ <sup>high</sup> cells with two different siRNAs prevented PKC agonist-induced AKT hypophosphorylation (Figure 5G). Since PKC $\alpha$  siRNA had no notable effect on the expression of other PKC isozymes (Figure 5H), these data confirm a requisite role for PKC $\alpha$  in PKC agonist-induced suppression of AKT activity in EC cells. The ability of the cPKC inhibitor, Gö6976, to block PKC $\alpha$ -induced AKT hypophosphorylation in PKC $\alpha$ <sup>high</sup> cells established the requirement for PKC $\alpha$  catalytic activity (Figure 5I), which was sustained for at least 6 hr in the cells (Figure S6).

Next, we determined if PKC $\alpha$  knockdown can affect basal levels of AKT activity in EC cells in the context of different levels of PI3K/AKT pathway hyperactivation. Loss of PKC $\alpha$  resulted in increased steady-state levels of AKT activity (as confirmed by increased pFOXO1) in KLE cells, which have no known alterations in the AKT/PI3K pathway, pointing to a tonic repressive effect of the enzyme on PI3K/AKT signaling in these cells (Figure 5J, left panel). Remarkably, PKC $\alpha$  knockdown also upregulated basal AKT activity in HEC-6 and SNG-M cells, two PTEN mutant cell lines that naturally harbor coincident mutations in the catalytic (PIK3CA) or regulatory (PIK3R1) subunits of PI3K, respectively (Weigelt et al., 2013) (Figure 5J, middle and right panels; also see Figure 5G, compare lane 1 with lanes 3–6 in both panels). The ability of PKC $\alpha$  to override hyperactive PI3K/AKT signaling was further investigated by silencing PTEN in two PTEN WT, PKC $\alpha$ <sup>high</sup> EC cell lines (HEC-1-A and HEC-50Co) that harbor activating mutations in *PIK3CA* or *PIK3R1*, respectively (Figure 5A). As expected, PTEN knockdown further increased PI3K/AKT signaling, as indicated by enhanced basal levels of pAKT<sup>Ser473</sup>, pAKT<sup>Thr308</sup>, and pPRAS40 (although consistently observed, this effect was modest, as might be expected in cell lines that already harbor PI3K subunit mutations) (Figure 5K). Importantly, PKC $\alpha$  signaling was able to suppress AKT activity even in the face of further activation of the pathway. These data, combined with evidence for downregulation of the PKC $\alpha$  target gene *Id1* (Figure 5L), a master regulator of tumor aggressiveness (Hao et al., 2011), further support a role for PKC $\alpha$  as a tumor suppressor in EC.

Since PP2A and PH domain leucine-rich repeat protein phosphatases (PHLPPs) have been identified as the main phosphatases that reverse AKT phosphorylation (Van Kanegan et al., 2005; Gao et al., 2005), we investigated their involvement in PKC $\alpha$ -mediated AKT hypophosphorylation in EC cells. These phosphatases are expressed (Figures 6A and 6B) and functional in EC cells. A role for PHLPP1/2 in regulation of AKT in EC cells was confirmed by the ability of the PHLPP1/2 inhibitors NCS45586 and NCS117079 (Sierecki et al., 2010) to increase basal AKT phosphorylation (Figure 6C). Enhanced AKT phosphorylation was similarly observed following inhibition of PP1 and PP2A/PP2A-like phosphatases with calyculin A or of PP2A family phosphatases alone with okadaic acid (Figure 6E). PMA was still able to suppress pAKT in the presence of the PHLPP1/2 inhibitors, indicating that the effects of PKC $\alpha$  are independent of PHLPP1/2 (Figure 6C). Since PP2A immunoprecipitation phosphatase assays combined with PKC $\alpha$  knockdown determined that PKC $\alpha$  activates PP2A in EC cells (Figure 6D), we explored the effects of PP2A inhibitors. Both calyculin A and okadaic acid blocked PMA-induced AKT hypophosphorylation, pointing to a mechanism dependent on PP2A or a PP2A-like phosphatase (Figure 6E). Together, these results indicate that PKC $\alpha$  inhibits PI3K/AKT signaling through a PHLPP-independent, PP2A-family-dependent mechanism.

### PKC $\alpha$ Loss Is Associated with Increased AKT Activity in Endometrial Lesions *In Vivo*

While universal loss of PKC $\alpha$  was seen in uterine lesions from *Pten* <sup>$\Delta 4-5/+$</sup> , *Pten*<sup>G129E/+</sup>, and *Pten*<sup>C124R/+</sup> mouse models, PKC $\alpha$ -retaining areas were detected in lesions arising in the *Pten*<sup>pr-/-</sup> mouse. This allowed comparison of AKT activity in PKC $\alpha$ -retaining and PKC $\alpha$ -deficient cells *in situ*. pAKT staining was stratified as none/low, medium, or high, and the association between pAKT staining intensity and the presence or absence of PKC $\alpha$  signal was quantified in serial sections. PKC $\alpha$  expression was associated with significant differences in AKT staining intensity ( $p < 0.005$ ), with PKC $\alpha$ -negative areas predominantly exhibiting high intensity pAKT staining and PKC $\alpha$ -positive areas largely coinciding with low-intensity pAKT staining (Figure 7A, compare areas indicated with block and open arrows). This correspondence supports a role for PKC $\alpha$  in suppression of PI3K/AKT signaling in endometrial tumor cells *in vivo* as well as *in vitro*.

### Inhibition of AKT Activity Is a Component of the PKC $\alpha$ Tumor-Suppressive Axis in EC Cells

The role of inhibition of PI3K/AKT signaling in the tumor-suppressive effects of PKC $\alpha$  in EC cells was tested using constructs expressing constitutively active AKT1: myristoylated AKT1 (myr-AKT), AKT-DD (T308D, S473D), and AKT-E17K (an active mutant identified in EC). All three constructs were tested in HEC-59 cells and at least one additional PKC $\alpha$ <sup>low</sup> EC cell line (RL95-2, HEC-116, Ishikawa, and/or HEC-251 EC cells). Constructs were introduced into cells by adenoviral or retroviral transduction, and the

(L) Downregulation of *Id1* in PMA-treated PKC $\alpha$ <sup>high</sup> (left) but not PKC $\alpha$ <sup>low</sup> (right) EC cells.

C, vehicle-treated. P, PMA (100 nM). D, DiC<sub>8</sub> (20  $\mu$ g/ml, replenished every 30 min).

In (B), (E), (J), and (K), effects on AKT activity are confirmed by analysis of the phosphorylation status of the AKT substrates, PRAS40 or FOXO1. Vertical lines in (C), (F), (G), and (I) indicate rearrangement of lanes from a single membrane for clarity. Results are representative of at least 3 biological replicates.

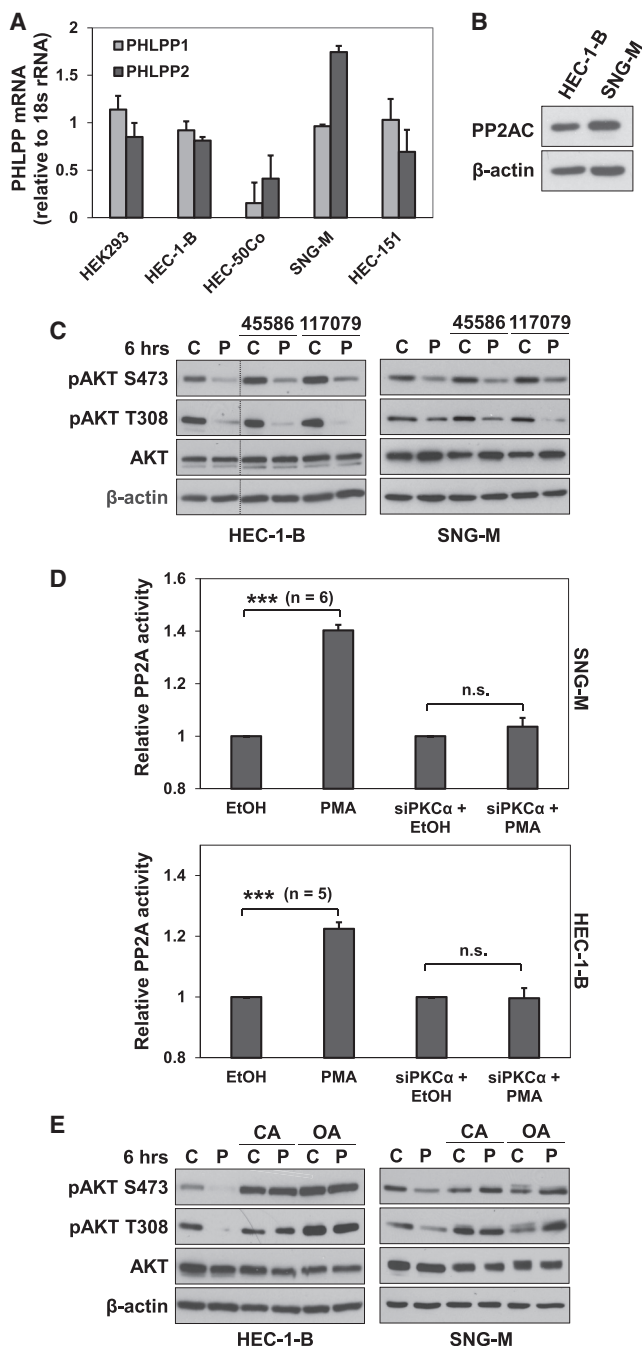

**Figure 6. PKC $\alpha$  Inhibits AKT Phosphorylation via a PHLPP-1/2-Independent, PP2A-like Phosphatase-Dependent Mechanism**

(A) PHLPP 1/2 mRNA expression in EC cells (HEK293 cells; positive control). (B) Expression of PP2AC in EC cells. (C) IB analysis of EC cells treated with PMA (P) or vehicle (C) in the presence of the PHLPP 1/2 inhibitors NSC45586 or NSC117079 (50  $\mu$ M). Vertical lines indicate rearrangement of lanes from a single membrane for clarity. (D) PP2A activity in EC cells treated with PMA in the presence or absence of PKC $\alpha$  knockdown. (E) EC cells treated with PMA in the presence of calyculin A (CA; 10 nM) or okadaic acid (OA; 1  $\mu$ M). Results are representative of at least 3 biological replicates. Error bars represent SEM. \*\*\*p = 0.005; n.s., not significant.

ability of exogenous PKC $\alpha$  to inhibit anchorage-independent growth was assessed. Expression of constitutively active AKT had minor, if any, effects on anchorage-independent growth of EC cells on its own (Figures 7B–7D). In contrast, all three constructs had a significant effect in cells transduced with PKC $\alpha$ , restoring both colony number and overall colony size, albeit to different extents in different cell lines (Figures 7B–7D). While the inability of constitutively active AKT to fully reverse the effects of PKC $\alpha$  points to the involvement of additional mechanisms (e.g., Id1 suppression), these data indicate that inhibition of AKT signaling is an important contributor to the tumor-suppressive actions of PKC $\alpha$  in the endometrium.

## DISCUSSION

The current study provides evidence for a tumor-suppressive role of PKC $\alpha$  signaling in PI3K/AKT-driven EC, via a mechanism that at least partially involves PP2A-family-mediated inactivation of AKT. The role of PKC $\alpha$  in tumorigenesis appears to be multifaceted. While the enzyme has been linked to tumor promotion in some systems, our studies add to a growing list of tumor types (e.g., colon and lung) in which PKC $\alpha$  signaling has tumor suppressive effects.

### PKC $\alpha$ Is Downregulated Early in Endometrial Tumorigenesis

Our IHC and qRT-PCR analysis of human ECs revealed loss of PKC $\alpha$  protein and mRNA in a majority of cases. Notably, more than half of grade 1 ECs showed deficiency of the enzyme, indicating that PKC $\alpha$  suppression can occur early during human endometrial tumorigenesis. This notion is supported by our analysis of mouse models of PI3K/AKT-driven endometrial neoplasia, which demonstrated loss of PKC $\alpha$  expression in pre-malignant hyperplasia regardless of the nature of PTEN dysregulation. Additional supportive evidence is provided by previous transcriptome analysis of early Type I ECs, which demonstrated a 3-fold downregulation of PKC $\alpha$  mRNA in tumors relative to normal endometrium (Saghir et al., 2010; Risinger et al., 2013), by stage-specific TCGA data, and by IHC analysis of a limited set of grade 1 ECs, which revealed regions of low or undetectable PKC $\alpha$  protein in a subset of lesions (Haughian et al., 2009).

Although loss of PKC $\alpha$  mRNA and protein has been noted in other tumor types, such as colon cancer (Verstovsek et al., 1998), non-small cell lung cancer (Hill et al., 2014), basal cell carcinoma (Neill et al., 2003), and T cell acute lymphoblastic leukemia (T-ALL) (Milani et al., 2014), the mechanisms underlying PKC $\alpha$  deficiency have yet to be defined. Our qRT-PCR and IHC analysis argues that decreased mRNA expression is the major mechanism involved in disabling PKC $\alpha$  functions in the endometrium. We further demonstrate that PKC $\alpha$  loss in EC can be mediated by transcriptional repression of the PKC $\alpha$  gene.

### Loss of PKC $\alpha$ Is Rate Limiting for Endometrial Tumor Development and Is Associated with More Aggressive EC

The precise correspondence between PKC $\alpha$  loss, PTEN deficiency, and AKT activation in murine endometrial lesions suggested that transcriptional suppression of PKC $\alpha$  could be a direct

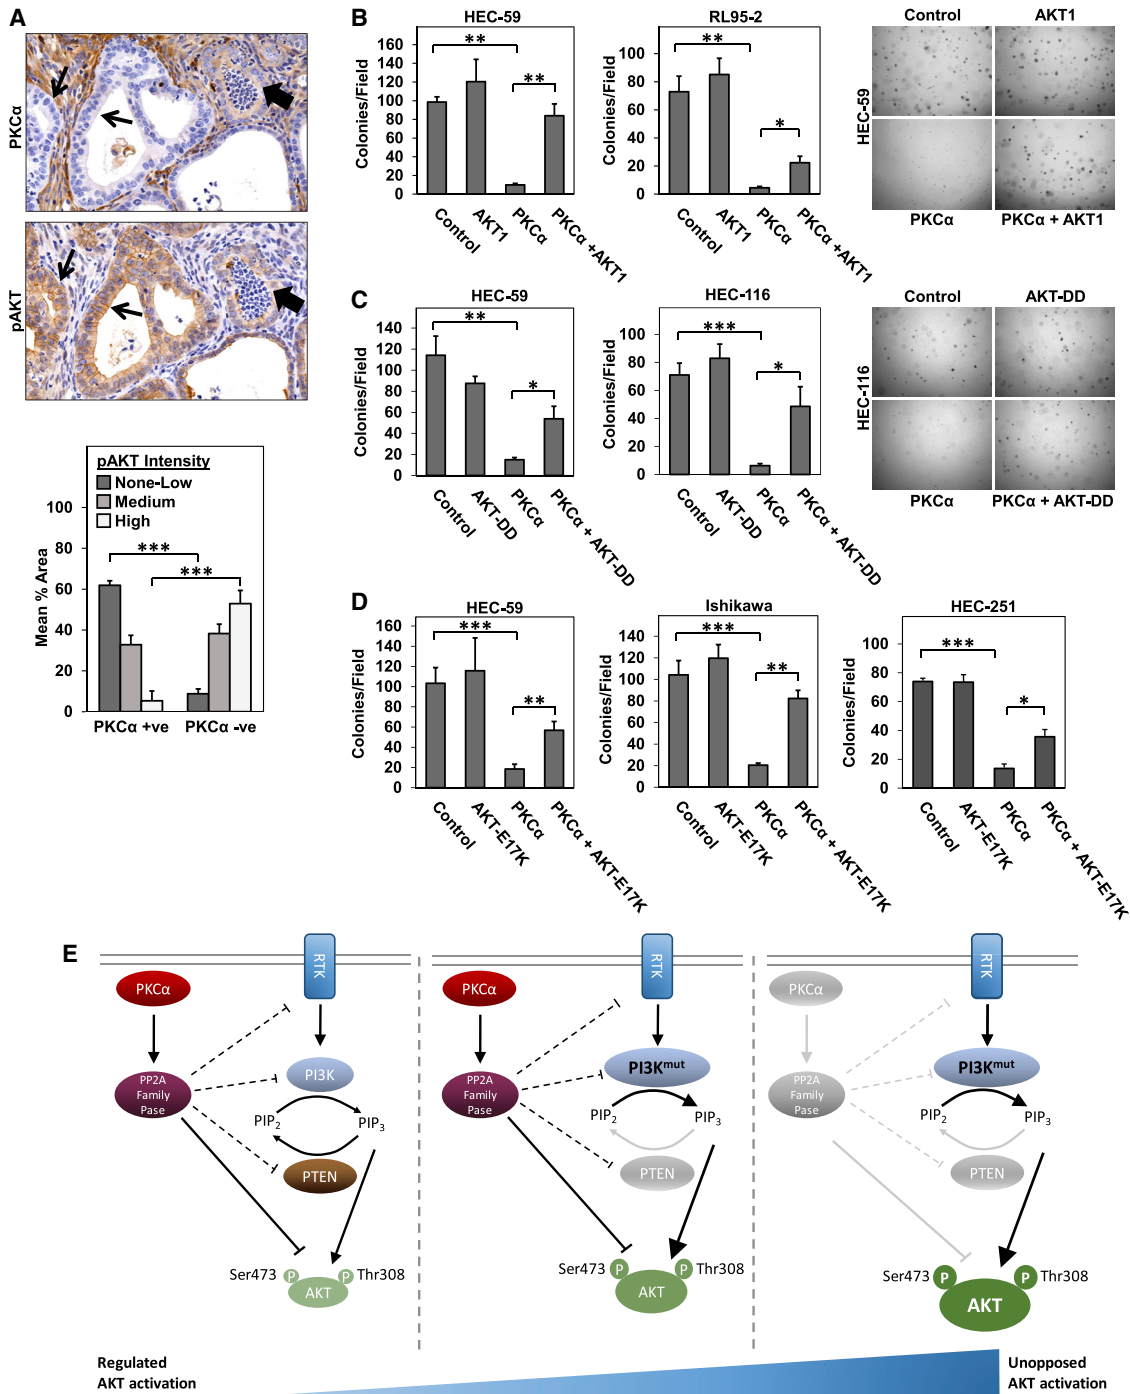

result of hyperactivation of the PI3K/AKT pathway, at least in some ECs. However, modulation of PTEN expression or AKT activity in human EC cells excluded this possibility, indicating that PKC $\alpha$  downregulation is not merely a passenger effect of aberrant PI3K/AKT signaling; rather, it is an alteration that is selected for because of specific contributions to endometrial tumor development. Anchorage-independent colony-formation assays provided direct evidence for a tumor-suppressive function of PKC $\alpha$  in human endometrial cells; restoration of PKC $\alpha$  expression and activity profoundly inhibited colony formation of human EC cells in soft agarose, while PKC $\alpha$  knockdown enhanced the transformed properties of EC cells that retained expression of the enzyme. The importance of early loss of PKC $\alpha$  was highlighted by the marked acceleration in uterine hyperplastic transformation observed in PKC $\alpha$ -deficient *Pten* <sup>$\Delta 4-5/+$</sup>  mice, a finding that pointed to abrogation of PKC $\alpha$  signaling as a rate-limiting step for tumor initiation in the endometrium. In advanced cases of human EC, the proportion of PKC $\alpha$ -negative tumors increased to >75%, suggesting that PKC $\alpha$  deficiency defines a subset of ECs with high risk of progression, a notion that is supported by our TMA analysis and TCPA data pointing to an association between reduced PKC $\alpha$  expression and decreased survival of EC patients. The finding that PKC $\alpha$  deficiency is associated with a 3-fold increase in risk of high-grade disease is consistent with previous reports in other tumor types. Genetic deletion of PKC $\alpha$  led to increased tumor burden, adenoma-to-carcinoma progression, and reduced survival in the *APC*<sup>Min/+</sup> mouse model of intestinal neoplasia (Oster and Leitges, 2006) and *KRas*-mediated models of lung tumorigenesis (Hill et al., 2014). Low PKC $\alpha$  expression identified a new subgroup of childhood T-ALL with an extremely poor outcome (Milani et al., 2014) and appears to enhance the tumorigenic potential of Gli1 in basal cell carcinoma (Neill et al., 2003). It will be interesting to determine if common mechanisms mediate PKC $\alpha$  loss in these tumor types.

### PKC $\alpha$ -Mediated Tumor Suppression in the Endometrium Involves Inhibition of PI3K/AKT Signaling

A majority of ECs harbor coexisting alterations in two or more PI3K/AKT pathway components, with additive effects on AKT activation that are crucial for EC development (Weigelt et al., 2013; Oda et al., 2005; Chen et al., 2006). Remarkably, knockdown of PKC $\alpha$  in cells with genetic hyperactivation of the PI3K/AKT pathway further enhanced the activity of AKT, highlighting the ability of PKC $\alpha$  deficiency to contribute to the strength of PI3K/AKT signaling in EC cells. The demonstration that PKC $\alpha$ -negative uterine regions in *Pten*<sup>PR-/-</sup> mice are associated with significantly higher levels of pAKT than PKC $\alpha$ -retaining regions argues that PKC $\alpha$  loss also contributes to PI3K/AKT hyperactivation during endometrial tumorigenesis *in vivo*. PKC $\alpha$  activity may also restrain AKT in the normal endometrium, since increased expression and membrane association of the enzyme coincide with the reported downregulation of AKT activity during the proestrus-to-estrus transition in rats (Dery et al., 2003). These findings, together with the demonstration that agonist-induced PKC $\alpha$  activation suppresses AKT in EC cells, identify PKC $\alpha$  as an inhibitor of PI3K/AKT signaling in the endometrium that is capable of disabling the AKT oncoprotein, even in the context of multiple activating mutations in upstream signaling intermediates (e.g., *PTEN* and

*PIK3CA* in HEC-251 cells and *PTEN*, *PIK3CA*, and *KRAS* in SNG-M cells). Inactivation of AKT appears to be a component of the tumor-suppressive actions of PKC $\alpha$  in endometrial cells, since constitutively active AKT diminished the inhibitory effects of PKC $\alpha$  on anchorage-independent growth of EC cells. Together, our findings support the idea that disruption of PKC $\alpha$  signaling may be critical for achieving the robust PI3K/AKT pathway activation that is required to drive EC development and progression (Figure 7E).

Crosstalk between PKC $\alpha$  and the PI3K/AKT pathway has been noted in other systems (Guan et al., 2007; Tanaka et al., 2003). PKC $\alpha$  can inactivate upstream modulators of PI3K such as growth factor receptors and scaffolding proteins (Koese et al., 2013; Oriente et al., 2005) and can dampen PI3K activity directly (Sipeki et al., 2006; Hoshino et al., 2012). Here, we demonstrate that PKC $\alpha$  activates the serine/threonine phosphatase PP2A in EC cells and inactivates AKT via a PP2A- or PP2A-like phosphatase-dependent mechanism. PKC $\alpha$ -induced AKT inactivation may involve direct effects of PP2A family phosphatases on activating phosphorylation at T308 and S473 (Manning and Toker, 2017), although potential effects on upstream regulators of AKT activity remain to be formally excluded (Figure 7E). (It should be noted that although PP2A may preferentially dephosphorylate AKT on the T308 site, it can also dephosphorylate AKT on the S473 site, as described in a variety of biological systems [Liao and Hung, 2010].) A role of PP2A in the antitumor effects of PKC $\alpha$  in the endometrium is consistent with known functions of the phosphatase as a bona fide tumor suppressor, with key activities in maintenance of cellular homeostasis (Perrotti and Neviani, 2013). Future studies will explore the specific PP2A family members involved as well as the specific holoenzyme complex(es) responsible for mediating PKC $\alpha$ -induced inactivation of AKT.

Together, our findings indicate that disruption of a PKC $\alpha$ -AKT signaling module plays a role in the development of EC, contributing to robust, unopposed AKT activation and promoting transformation of endometrial cells (Figure 7E). These studies provide a foundation for exploring the prognostic value of PKC $\alpha$  expression in EC and the potential of harnessing PKC $\alpha$ →PP2A family phosphatase signaling for therapeutic benefit in a subset of ECs.

### EXPERIMENTAL PROCEDURES

A detailed description of methodology and analysis is provided in [Supplemental Experimental Procedures](#).

#### Human Tissues

Endometrial tumors and normal tissue were collected by C.D.M. with approval from the Ohio State University and Roswell Park Comprehensive Cancer Center institutional review boards. Analysis of patient survival in relation to PKC $\alpha$  protein status used the MDACC-endometrial-L3-S40 dataset (TCPA).

#### Cell Lines and Reagents

The sources of human EC cell lines and reagents used in the study are detailed in [Supplemental Experimental Procedures](#).

#### Mice

All animal husbandry was in compliance with regulations and protocols approved by Institutional Animal Care and Use Committees at the University of Nebraska Medical Center, Ohio State University, and Cincinnati Children's



Hospital Medical Center. Phases of the estrous cycle in female mice were determined by vaginal smears as described previously (Byers et al., 2012). Allele-specific mutant *Pten*-knockin mice were generated and characterized as described previously (Wang et al., 2010), and generation and genotyping of *Prkca*<sup>+/+</sup>;*Pten*<sup>Δ4-5/+</sup> and *Prkca*<sup>-/-</sup>;*Pten*<sup>Δ4-5/+</sup> mice were performed as detailed in Supplemental Experimental Procedures. *Pten* conditional-knockout animals were generated by mating *Pten*<sup>fl/fl</sup> and PR-Cre or Ltf-Cre animals (Daikoku et al., 2008, 2014). Uterine tissues were collected from 1- to 9-month-old female mice for analysis.

#### LCM

Normal and neoplastic uterine tissue was collected from frozen sections by LCM and analyzed for PKC $\alpha$  mRNA levels by qRT-PCR.

#### IHC

Tissue sections were immunostained for PKC $\alpha$ , pAKT<sup>Ser473</sup>, PTEN, Ki67, and Id1 using published protocols. Immunostaining was quantified using DEFINIENS software. For quantitative comparison of pAKT and PKC $\alpha$  levels, staining for these markers in consecutive sections was overlaid using Adobe Photoshop CC, and areas of negative/low, medium, and high pAKT staining within PKC $\alpha$ -positive and PKC $\alpha$ -negative regions were determined.

#### Western Blotting

Western blot analysis was performed as described previously (Frey et al., 2000). Information on antibodies is provided in Supplemental Experimental Procedures. All immunoblots are representative of at least three biological replicates.

#### RNAi

Lentiviral vectors expressing PTEN small hairpin RNA (shRNA) were used to generate stable PTEN-knockdown EC cells. Transient knockdown of PKC $\alpha$  was achieved by transfection of siRNA using RNAiMAX transfection reagent. Non-targeting shRNA and small interfering RNA (siRNA) were used as controls.

#### PP2A Activity Assay

PP2A activity was measured using a PP2A Immunoprecipitation Phosphatase Assay Kit (Millipore) as described elsewhere (Guan et al., 2007).

#### Anchorage-Independent Growth Assays

Transduction of cells with adenoviral and retroviral vectors expressing LacZ, PKC $\alpha$ , kinase-dead PKC $\alpha$ , and/or constitutively active AKT1 (myr-AKT, AKT-DD [T308D, S473D], and AKT-E17K) and analysis of growth in soft agarose are described in Supplemental Experimental Procedures.

#### RNA Isolation and qRT-PCR Analysis

RNA isolation was performed using the illustra RNAspin Mini RNA isolation kit (GE Healthcare) or Trizol reagent (Invitrogen) and qRT-PCR reactions used Brilliant II SYBR Green QRT-PCR 1-Step Master Mix, with primers listed in Supplemental Experimental Procedures.

#### Nascent RNA Capture

Isolation of nascent RNA was performed using the Click-iT Nascent RNA Capture Kit (Life Technologies). Quantification of PKC $\alpha$  and GAPDH mRNA by qRT-PCR used iScript cDNA Synthesis and iTaq Universal SYBR Green Supermix Kits (Bio-Rad).

#### Statistical Analysis

Data are presented as the mean  $\pm$  SEM of three or more independent experiments unless otherwise stated. Statistical analysis was performed using Excel, GraphPad Prism, or SAS software version 9.3. *p* values of less than 0.05 were considered statistically significant. Significance was assessed using Student's *t* test for comparison of means, chi-square or Fisher's exact test for categorical analysis of two groups, Wilcoxon rank-sum test for nonparametric comparison of two samples, two-way ANOVA test for multiple comparisons, Spearman's rank correlation for comparison of ordinal categorical expression data, and log-rank test for survival data. A linear mixed-effects model was used to determine the association between PKC $\alpha$  and pAKT staining in

*Pten*<sup>PR-/-</sup> endometrium. Fixed effects were included for analysis of PKC $\alpha$  and pAKT levels and their interaction. A random effect was included for the slide. Pairwise comparisons were adjusted for multiple comparisons with Tukey's method. Model assumptions were examined with residual plots.

#### SUPPLEMENTAL INFORMATION

Supplemental Information includes Supplemental Experimental Procedures, six figures, and one table and can be found with this article online at <https://doi.org/10.1016/j.celrep.2018.06.067>.

#### ACKNOWLEDGMENTS

We thank Kathryn Curry, Angela Omilian, and Elizabeth Brese for expert technical assistance and the UNMC Tissue Facility (Lijun Sun and Jiang Jiang) for services. This research was supported by NIH grants CA036727 and CA016056 (Cancer Center grants), DK060632 and CA191894 (J.D.B.), and HD068524 and CA077839 (S.K.D.). A.H.H. was supported by a UNMC Dean for Graduate Studies Fellowship.

#### AUTHOR CONTRIBUTIONS

A.H.H., A.R.B., and J.D.B. designed the experiments, interpreted the data, and prepared the manuscript. A.H.H., M.A.L., K.-S.S., and A.R.B. executed and analyzed the experiments. P.J.F. and C.D.M. collected human ECs and de-identified medical information. B.C. performed statistical analysis, and S.M.L. and Y.M.S. provided pathology expertise. T.D., S.K.D., and G.L. developed animal models and provided samples from these models.

#### DECLARATION OF INTERESTS

The authors declare no competing interests.

Received: June 5, 2017

Revised: April 25, 2018

Accepted: June 13, 2018

Published: July 17, 2018

#### REFERENCES

- Antal, C.E., Hudson, A.M., Kang, E., Zanca, C., Wirth, C., Stephenson, N.L., Trotter, E.W., Gallegos, L.L., Miller, C.J., Furnari, F.B., et al. (2015). Cancer-associated protein kinase C mutations reveal kinase's role as tumor suppressor. *Cell* *160*, 489–502.
- Black, J.D. (2001). Protein kinase C isozymes in colon carcinogenesis: guilt by omission. *Gastroenterology* *120*, 1868–1872.
- Black, A.R., and Black, J.D. (2013). Protein kinase C signaling and cell cycle regulation. *Front. Immunol.* *3*, 423.
- Byers, S.L., Wiles, M.V., Dunn, S.L., and Taft, R.A. (2012). Mouse estrous cycle identification tool and images. *PLoS ONE* *7*, e35538.
- Cameron, A.J., Procyk, K.J., Leitges, M., and Parker, P.J. (2008). PKC alpha protein but not kinase activity is critical for glioma cell proliferation and survival. *Int. J. Cancer* *123*, 769–779.
- Castagna, M., Takai, Y., Kaibuchi, K., Sano, K., Kikkawa, U., and Nishizuka, Y. (1982). Direct activation of calcium-activated, phospholipid-dependent protein kinase by tumor-promoting phorbol esters. *J. Biol. Chem.* *257*, 7847–7851.
- Chen, M.L., Xu, P.Z., Peng, X.D., Chen, W.S., Guzman, G., Yang, X., Di Cristofano, A., Pandolfi, P.P., and Hay, N. (2006). The deficiency of Akt1 is sufficient to suppress tumor development in *Pten*<sup>+/-</sup> mice. *Genes Dev.* *20*, 1569–1574.
- Daikoku, T., Hirota, Y., Tranguich, S., Joshi, A.R., DeMayo, F.J., Lydon, J.P., Ellenson, L.H., and Dey, S.K. (2008). Conditional loss of uterine *Pten* unfailingly and rapidly induces endometrial cancer in mice. *Cancer Res.* *68*, 5619–5627.



- Daikoku, T., Ogawa, Y., Terakawa, J., Ogawa, A., DeFalco, T., and Dey, S.K. (2014). Lactoferrin-iCre: a new mouse line to study uterine epithelial gene function. *Endocrinology* *155*, 2718–2724.
- Dedes, K.J., Wetterskog, D., Ashworth, A., Kaye, S.B., and Reis-Filho, J.S. (2011). Emerging therapeutic targets in endometrial cancer. *Nat. Rev. Clin. Oncol.* *8*, 261–271.
- Dery, M.-C., Leblanc, V., Shooner, C., and Asselin, E. (2003). Regulation of Akt expression and phosphorylation by 17 $\beta$ -estradiol in the rat uterus during estrous cycle. *Reprod. Biol. Endocrinol.* *1*, 47.
- Engelsen, I.B., Akslen, L.A., and Salvesen, H.B. (2009). Biologic markers in endometrial cancer treatment. *APMIS* *117*, 693–707.
- Fader, A.N., Arriba, L.N., Frasure, H.E., and von Gruenigen, V.E. (2009). Endometrial cancer and obesity: epidemiology, biomarkers, prevention and survivorship. *Gynecol. Oncol.* *114*, 121–127.
- Frey, M.R., Clark, J.A., Leontieva, O., Uronis, J.M., Black, A.R., and Black, J.D. (2000). Protein kinase C signaling mediates a program of cell cycle withdrawal in the intestinal epithelium. *J. Cell Biol.* *151*, 763–778.
- Gao, T., Furnari, F., and Newton, A.C. (2005). PHLPP: a phosphatase that directly dephosphorylates Akt, promotes apoptosis, and suppresses tumor growth. *Mol. Cell* *18*, 13–24.
- Garg, R., Benedetti, L.G., Abera, M.B., Wang, H., Abba, M., and Kazanietz, M.G. (2014). Protein kinase C and cancer: what we know and what we do not. *Oncogene* *33*, 5225–5237.
- Georgescu, M.M. (2010). PTEN tumor suppressor network in PI3K-Akt pathway control. *Genes Cancer* *1*, 1170–1177.
- Guan, L., Song, K., Pysz, M.A., Curry, K.J., Hizli, A.A., Danielpour, D., Black, A.R., and Black, J.D. (2007). Protein kinase C-mediated down-regulation of cyclin D1 involves activation of the translational repressor 4E-BP1 via a phosphoinositide 3-kinase/Akt-independent, protein phosphatase 2A-dependent mechanism in intestinal epithelial cells. *J. Biol. Chem.* *282*, 14213–14225.
- Hao, F., Pysz, M.A., Curry, K.J., Haas, K.N., Seedhouse, S.J., Black, A.R., and Black, J.D. (2011). Protein kinase C $\alpha$  signaling regulates inhibitor of DNA binding 1 in the intestinal epithelium. *J. Biol. Chem.* *286*, 18104–18117.
- Haughian, J.M., Reno, E.M., Thorne, A.M., and Bradford, A.P. (2009). Protein kinase C alpha-dependent signaling mediates endometrial cancer cell growth and tumorigenesis. *Int. J. Cancer* *125*, 2556–2564.
- Hayes, M.P., Wang, H., Espinal-Witter, R., Douglas, W., Solomon, G.J., Baker, S.J., and Ellenson, L.H. (2006). *PIK3CA* and *PTEN* mutations in uterine endometrioid carcinoma and complex atypical hyperplasia. *Clin. Cancer Res.* *12*, 5932–5935.
- Hill, K.S., Erdogan, E., Khoo, A., Walsh, M.P., Leitges, M., Murray, N.R., and Fields, A.P. (2014). Protein kinase C $\alpha$  suppresses Kras-mediated lung tumor formation through activation of a p38 MAPK-TGF $\beta$  signaling axis. *Oncogene* *33*, 2134–2144.
- Hollander, M.C., Blumenthal, G.M., and Dennis, P.A. (2011). PTEN loss in the continuum of common cancers, rare syndromes and mouse models. *Nat. Rev. Cancer* *11*, 289–301.
- Hong, B., Le Gallo, M., and Bell, D.W. (2015). The mutational landscape of endometrial cancer. *Curr. Opin. Genet. Dev.* *30*, 25–31.
- Hoshino, D., Jourquin, J., Emmons, S.W., Miller, T., Goldgof, M., Costello, K., Tyson, D.R., Brown, B., Lu, Y., Prasad, N.K., et al. (2012). Network analysis of the focal adhesion to invadopodia transition identifies a PI3K-PKC $\alpha$  invasive signaling axis. *Sci. Signal.* *5*, ra66.
- Kandoth, C., Schultz, N., Cherniack, A.D., Akbani, R., Liu, Y., Shen, H., Robertson, A.G., Pashtan, I., Shen, R., Benz, C.C., et al.; Cancer Genome Atlas Research Network (2013). Integrated genomic characterization of endometrial carcinoma. *Nature* *497*, 67–73.
- Koese, M., Rentero, C., Kota, B.P., Hoque, M., Cairns, R., Wood, P., Vilà de Muga, S., Reverter, M., Alvarez-Guaita, A., Monastyrskaya, K., et al. (2013). Annexin A6 is a scaffold for PKC $\alpha$  to promote EGFR inactivation. *Oncogene* *32*, 2858–2872.
- Liang, H., Cheung, L.W.T., Li, J., Ju, Z., Yu, S., Stemke-Hale, K., Dogruluk, T., Lu, Y., Liu, X., Gu, C., et al. (2012). Whole-exome sequencing combined with functional genomics reveals novel candidate driver cancer genes in endometrial cancer. *Genome Res.* *22*, 2120–2129.
- Liao, Y., and Hung, M.-C. (2010). Physiological regulation of Akt activity and stability. *Am. J. Transl. Res.* *2*, 19–42.
- Manning, B.D., and Toker, A. (2017). AKT/PKB signaling: navigating the network. *Cell* *169*, 381–405.
- Milani, G., Reborá, P., Accordi, B., Galla, L., Bresolin, S., Cazzaniga, G., Buldini, B., Mura, R., Ladogana, S., Giraldo, E., et al. (2014). Low PKC $\alpha$  expression within the MRD-HR stratum defines a new subgroup of childhood T-ALL with very poor outcome. *Oncotarget* *5*, 5234–5245.
- Mochly-Rosen, D., Das, K., and Grimes, K.V. (2012). Protein kinase C, an elusive therapeutic target? *Nat. Rev. Drug Discov.* *11*, 937–957.
- Neill, G.W., Ghali, L.R., Green, J.L., Ikram, M.S., Philpott, M.P., and Quinn, A.G. (2003). Loss of protein kinase C $\alpha$  expression may enhance the tumorigenic potential of Gli1 in basal cell carcinoma. *Cancer Res.* *63*, 4692–4697.
- Oda, K., Stokoe, D., Taketani, Y., and McCormick, F. (2005). High frequency of coexistent mutations of *PIK3CA* and *PTEN* genes in endometrial carcinoma. *Cancer Res.* *65*, 10669–10673.
- Oriente, F., Andreozzi, F., Romano, C., Perruolo, G., Perfetti, A., Fiory, F., Miele, C., Beguinot, F., and Formisano, P. (2005). Protein kinase C- $\alpha$  regulates insulin action and degradation by interacting with insulin receptor substrate-1 and 14-3-3 epsilon. *J. Biol. Chem.* *280*, 40642–40649.
- Oster, H., and Leitges, M. (2006). Protein kinase C alpha but not PKCzeta suppresses intestinal tumor formation in ApcMin/+ mice. *Cancer Res.* *66*, 6955–6963.
- Perrotti, D., and Neviani, P. (2013). Protein phosphatase 2A: a target for anti-cancer therapy. *Lancet Oncol.* *14*, e229–e238.
- Podsypanina, K., Ellenson, L.H., Nemes, A., Gu, J., Tamura, M., Yamada, K.M., Cordon-Cardo, C., Catoretti, G., Fisher, P.E., and Parsons, R. (1999). Mutation of Pten/Mmac1 in mice causes neoplasia in multiple organ systems. *Proc. Natl. Acad. Sci. USA* *96*, 1563–1568.
- Pysz, M.A., Leontieva, O.V., Bateman, N.W., Uronis, J.M., Curry, K.J., Threadgill, D.W., Janssen, K.P., Robine, S., Velcich, A., Augenlicht, L.H., et al. (2009). PKC $\alpha$  tumor suppression in the intestine is associated with transcriptional and translational inhibition of cyclin D1. *Exp. Cell Res.* *315*, 1415–1428.
- Risinger, J.I., Allard, J., Chandran, U., Day, R., Chandramouli, G.V., Miller, C., Zahn, C., Oliver, J., Litz, T., Marcus, C., et al. (2013). Gene expression analysis of early stage endometrial cancers reveals unique transcripts associated with grade and histology but not depth of invasion. *Front. Oncol.* *3*, 139.
- Saghir, F.S., Rose, I.M., Dali, A.Z., Shamsuddin, Z., Jamal, A.R., and Mokhtar, N.M. (2010). Gene expression profiling and cancer-related pathways in type I endometrial carcinoma. *Int. J. Gynecol. Cancer* *20*, 724–731.
- Siegel, R.L., Miller, K.D., and Jemal, A. (2017). *Cancer Statistics, 2017*. *CA Cancer J. Clin.* *67*, 7–30.
- Sierecki, E., Sinko, W., McCammon, J.A., and Newton, A.C. (2010). Discovery of small molecule inhibitors of the PH domain leucine-rich repeat protein phosphatase (PHLPP) by chemical and virtual screening. *J. Med. Chem.* *53*, 6899–6911.
- Sipeki, S., Bander, E., Parker, P.J., and Faragó, A. (2006). PKC $\alpha$  reduces the lipid kinase activity of the p110 $\alpha$ /p85 $\alpha$  PI3K through the phosphorylation of the catalytic subunit. *Biochem. Biophys. Res. Commun.* *339*, 122–125.
- Stambolic, V., Tsao, M.S., Macpherson, D., Suzuki, A., Chapman, W.B., and Mak, T.W. (2000). High incidence of breast and endometrial neoplasia resembling human Cowden syndrome in pten $^{+/-}$  mice. *Cancer Res.* *60*, 3605–3611.
- Suarez, A.A., Felix, A.S., and Cohn, D.E. (2017). Bokhman redux: endometrial cancer “types” in the 21st century. *Gynecol. Oncol.* *144*, 243–249.
- Tam, W.L., Lu, H., Buikhuisen, J., Soh, B.S., Lim, E., Reinhardt, F., Wu, Z.J., Krall, J.A., Bierie, B., Guo, W., et al. (2013). Protein kinase C  $\alpha$  is a central signaling node and therapeutic target for breast cancer stem cells. *Cancer Cell* *24*, 347–364.

- Tanaka, Y., Gavrielides, M.V., Mitsuchi, Y., Fujii, T., and Kazanietz, M.G. (2003). Protein kinase C promotes apoptosis in LNCaP prostate cancer cells through activation of p38 MAPK and inhibition of the Akt survival pathway. *J. Biol. Chem.* *278*, 33753–33762.
- Van Kanegan, M.J., Adams, D.G., Wadzinski, B.E., and Strack, S. (2005). Distinct protein phosphatase 2A heterotrimers modulate growth factor signaling to extracellular signal-regulated kinases and Akt. *J. Biol. Chem.* *280*, 36029–36036.
- Verstovsek, G., Byrd, A., Frey, M.R., Petrelli, N.J., and Black, J.D. (1998). Colonocyte differentiation is associated with increased expression and altered distribution of protein kinase C isozymes. *Gastroenterology* *115*, 75–85.
- Wang, H., Douglas, W., Lia, M., Edelman, W., Kucherlapati, R., Podsypanina, K., Parsons, R., and Ellenson, L.H. (2002). DNA mismatch repair deficiency accelerates endometrial tumorigenesis in Pten heterozygous mice. *Am. J. Pathol.* *160*, 1481–1486.
- Wang, H., Karikomi, M., Naidu, S., Rajmohan, R., Caserta, E., Chen, H.Z., Rawahneh, M., Moffitt, J., Stephens, J.A., Fernandez, S.A., et al. (2010). Allele-specific tumor spectrum in pten knockin mice. *Proc. Natl. Acad. Sci. USA* *107*, 5142–5147.
- Weigelt, B., Warne, P.H., Lambros, M.B., Reis-Filho, J.S., and Downward, J. (2013). PI3K pathway dependencies in endometrioid endometrial cancer cell lines. *Clin. Cancer Res.* *19*, 3533–3544.

**Cell Reports, Volume 24**

## **Supplemental Information**

### **Crosstalk between PKC $\alpha$ and PI3K/AKT Signaling**

#### **Is Tumor Suppressive in the Endometrium**

**Alice H. Hsu, Michelle A. Lum, Kang-Sup Shim, Peter J. Frederick, Carl D. Morrison, Baojiang Chen, Subodh M. Lele, Yuri M. Sheinin, Takiko Daikoku, Sudhansu K. Dey, Gustavo Leone, Adrian R. Black, and Jennifer D. Black**

A

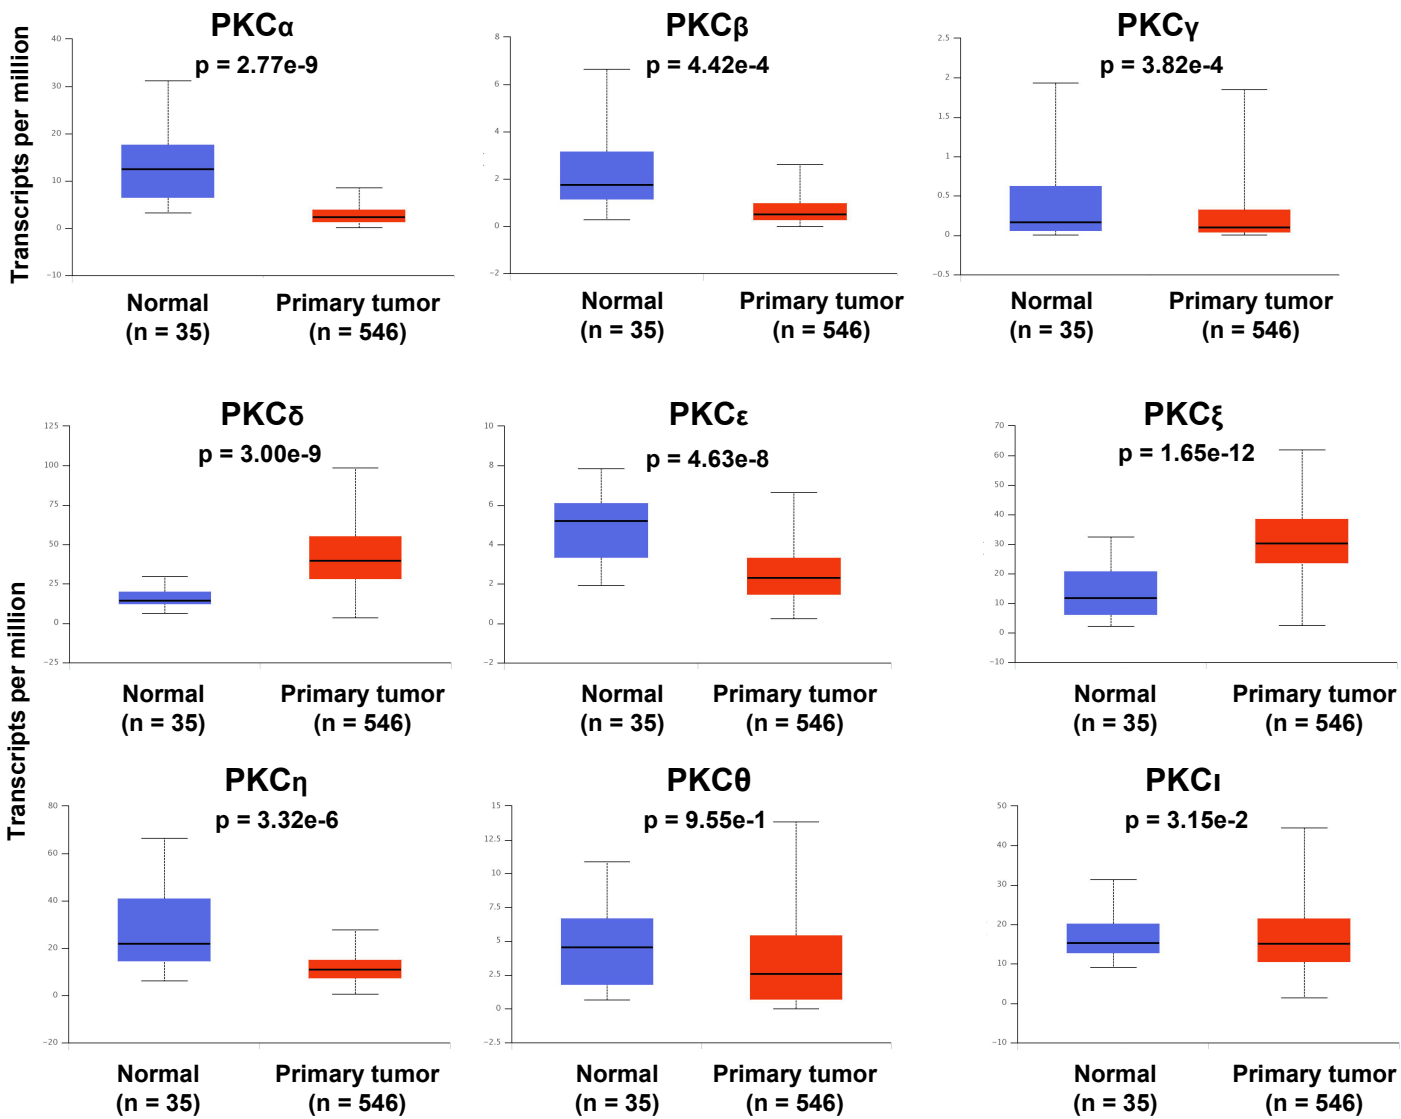

B

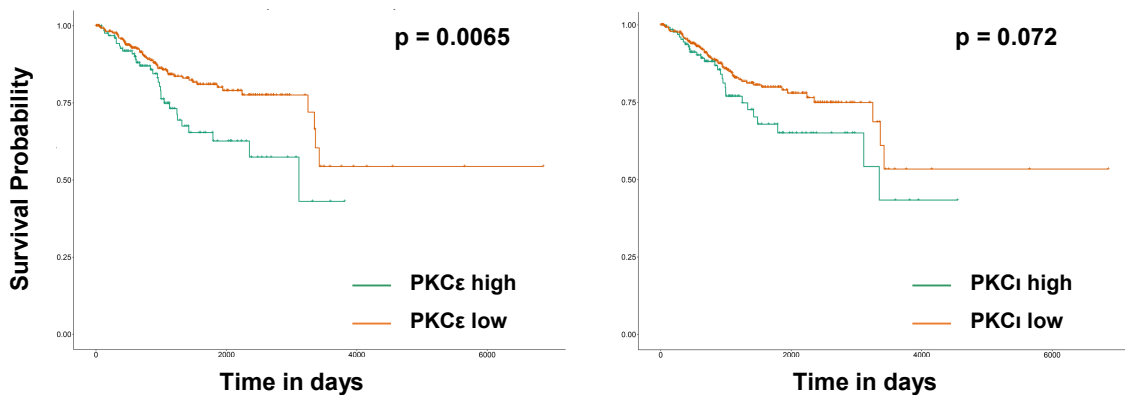

**Figure S1. PKC isozyme mRNA expression profiles and correlation with survival probability in EC (related to Figure 1).** (A) PKC isozyme mRNA levels in normal endometrium vs primary endometrial tumors. While PKC $\alpha$ ,  $\beta$ ,  $\epsilon$ , and  $\eta$  mRNA expression is reduced in ECs, levels of PKC  $\delta$  and  $\zeta$  mRNA are increased, and PKC $\gamma$ ,  $\theta$  and  $\iota$  mRNA expression is essentially unchanged in these tumors. (B) Correlation between PKC $\epsilon$  or PKC $\iota$  expression and survival probability. High levels of either PKC $\epsilon$  or  $\iota$  are associated with reduced survival in EC patients, consistent with the identification of tumor promoting functions of PKC $\epsilon$  and  $\iota$  in other cancer types (see text). Results were obtained from analysis of TCGA data.



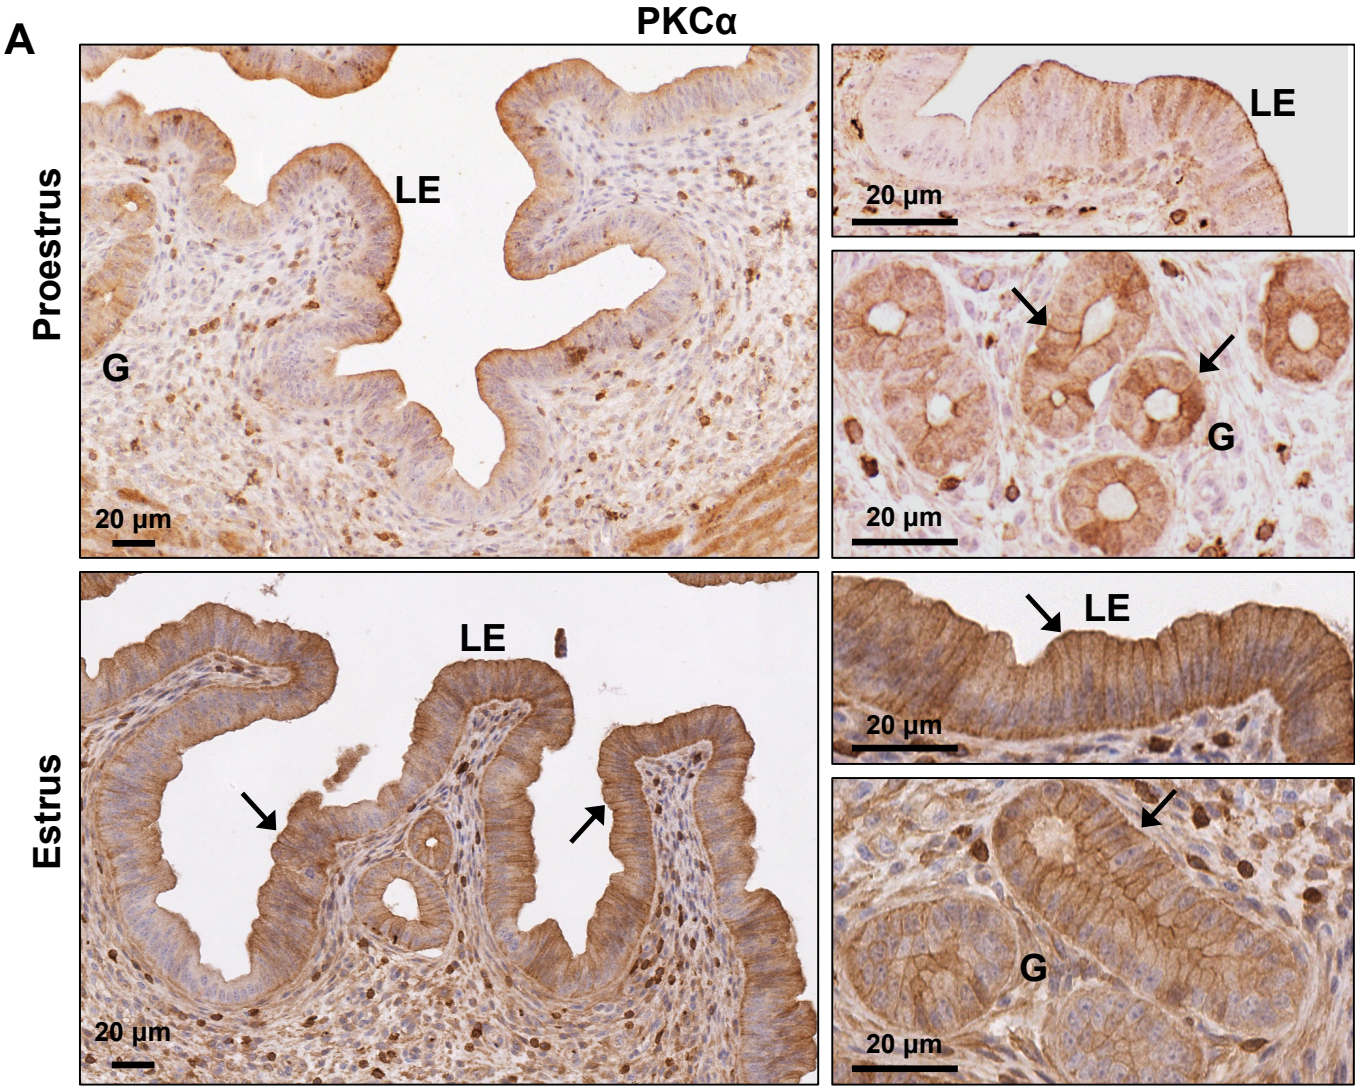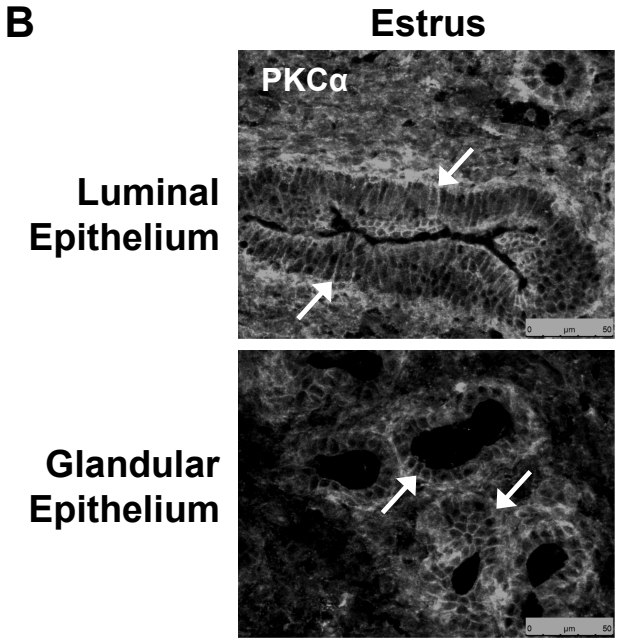

**Figure S2. Expression and subcellular distribution of PKC $\alpha$  in the mouse endometrium during proestrus and estrus phases (related to Figure 2).** (A) IHC analysis of PKC $\alpha$  expression in the luminal (LE) and glandular (G) epithelial compartments of uterine tissue during late proestrus and estrus. Membrane-associated localization of PKC $\alpha$  indicates activation of the kinase. In late proestrus, PKC $\alpha$  expression is cytoplasmic in the luminal compartment but membrane-associated in the glands (arrows). In estrus, membrane association of PKC $\alpha$  is detected in both the luminal and glandular epithelium (arrows). (B) Immunofluorescence staining for PKC $\alpha$  in frozen sections of luminal and glandular epithelium in estrus phase, confirming the localization seen in paraffin sections.



Proestrus

Estrus

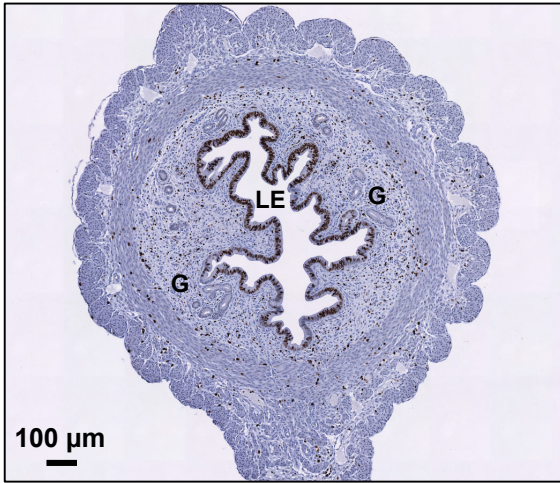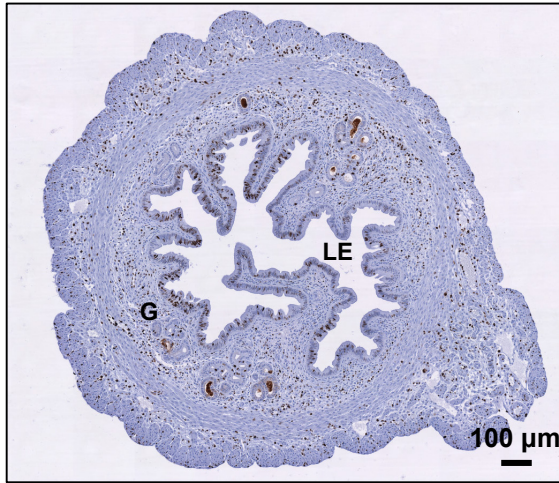

Ki67

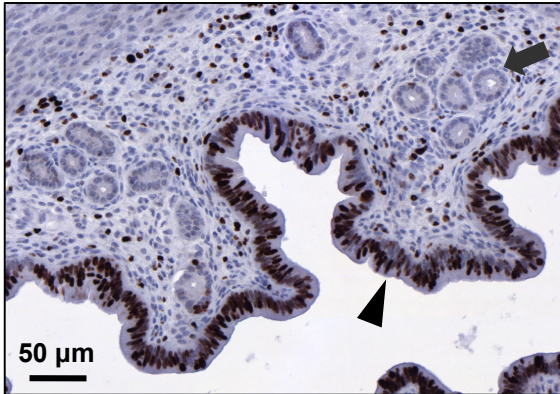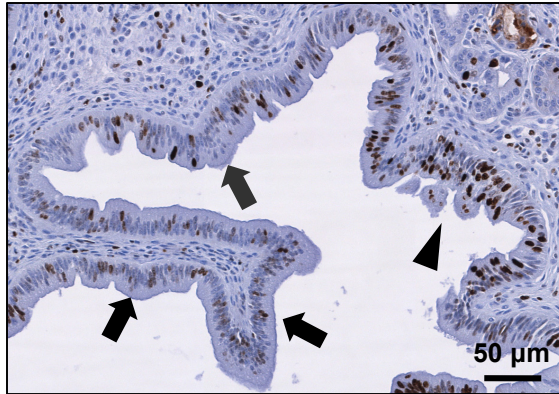

Ki67

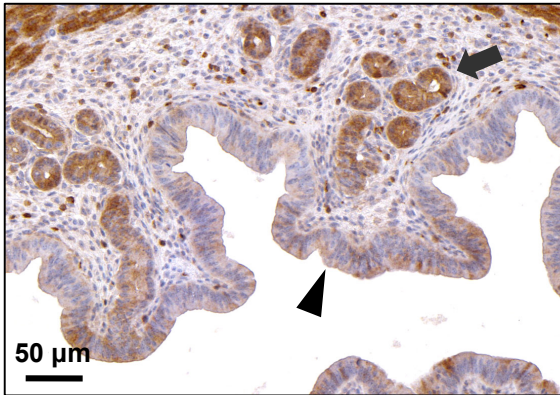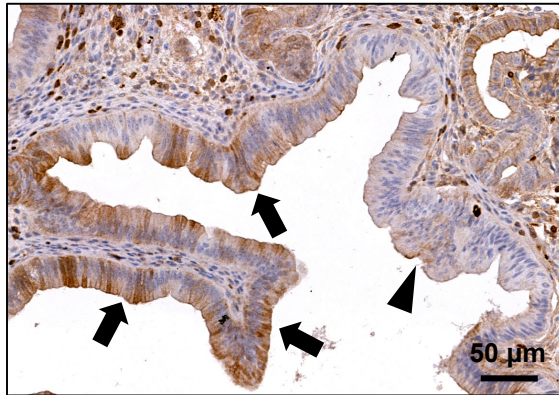

PKCα

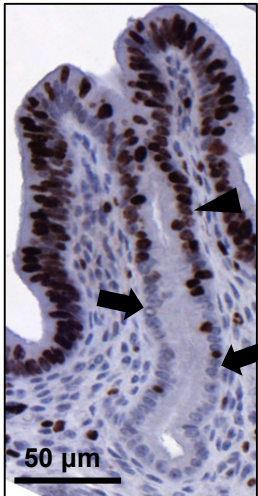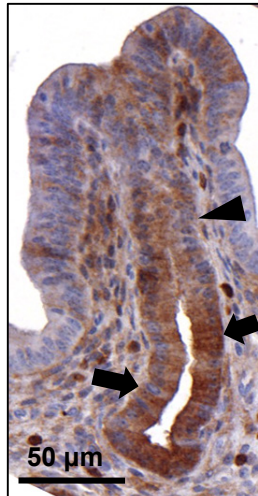

Ki67

PKCα

**Figure S3. Inverse correlation between PKCα activity and Ki67 staining in mouse uterine epithelium (related to Figure 2).** Serial sections from late proestrus and estrus phase uterine epithelium were analyzed for PKCα and the proliferation marker, Ki67. *Top Panels:* Survey sections show markedly reduced proliferation in the luminal epithelium (LE) during estrus phase; glands (G) are negative for Ki67 staining in both late proestrus and estrus phases. Arrows in the lower panels indicate areas of PKCα membrane association/activation; arrowheads indicate areas that lack membrane-associated PKCα. Note the strong nuclear Ki67 staining in areas which lack membrane-associated PKCα. In contrast, areas with low levels of Ki67 exhibit strong membrane association/activation of the enzyme.

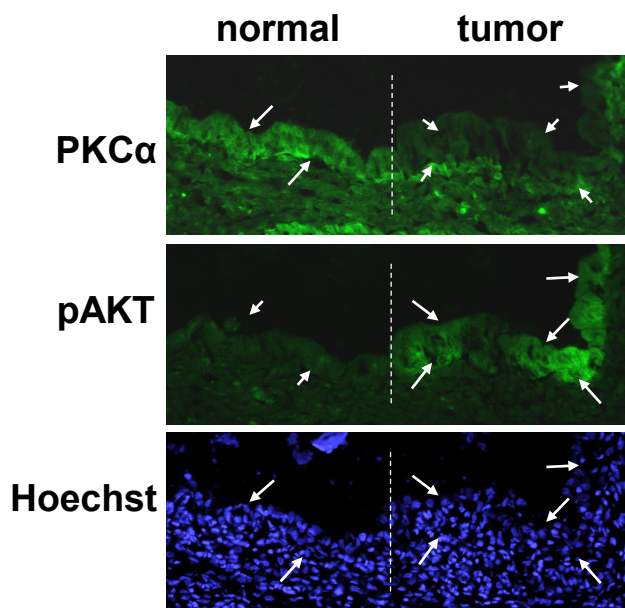

**Figure S4. Laser capture microdissection of uterine epithelium guided by immunofluorescence staining for PKC $\alpha$  or pAKT S473 (related to Figure 2).** Immunofluorescence analysis of serial sections of frozen uterine tissue from a 9 month *Pten*<sup>A4-5/+</sup>; *Prkca*<sup>+/+</sup> mouse identifies normal epithelium (PKC $\alpha$ <sup>pos</sup>; pAKT<sup>neg</sup>) and tumor lesions (PKC $\alpha$ <sup>neg</sup>; pAKT<sup>pos</sup>). The presence of PKC $\alpha$  or pAKT is indicated by larger arrows; small arrows identify regions that are negative for marker expression. PKC $\alpha$  mRNA expression in normal and tumor tissue isolated by laser microdissection was quantified by qRT-PCR analysis and results are shown in Figure 2E.



*Pten*<sup>G129E/+</sup>

PKC $\alpha$

Id1

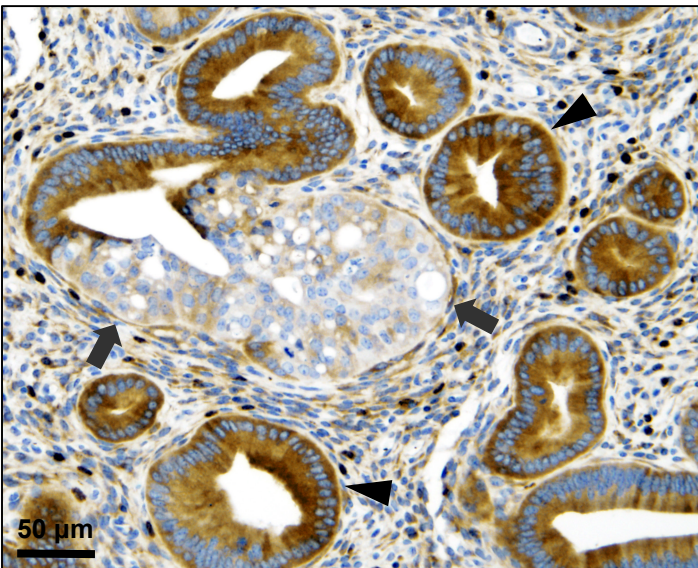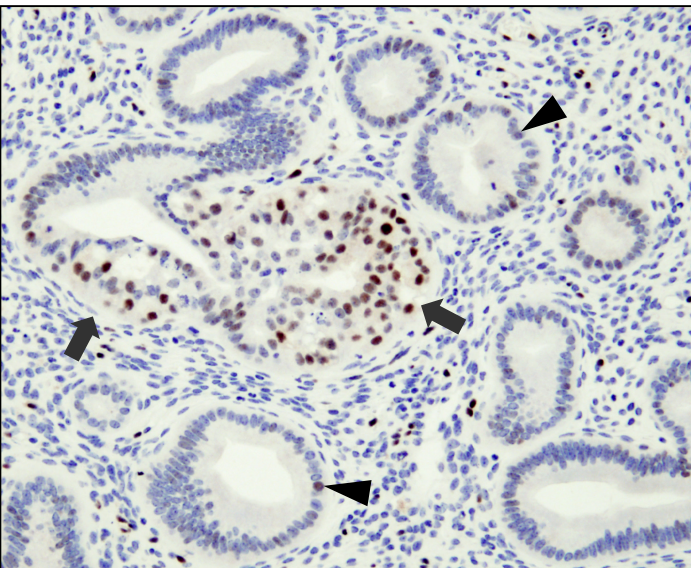

*Pten*<sup>C124R/+</sup>

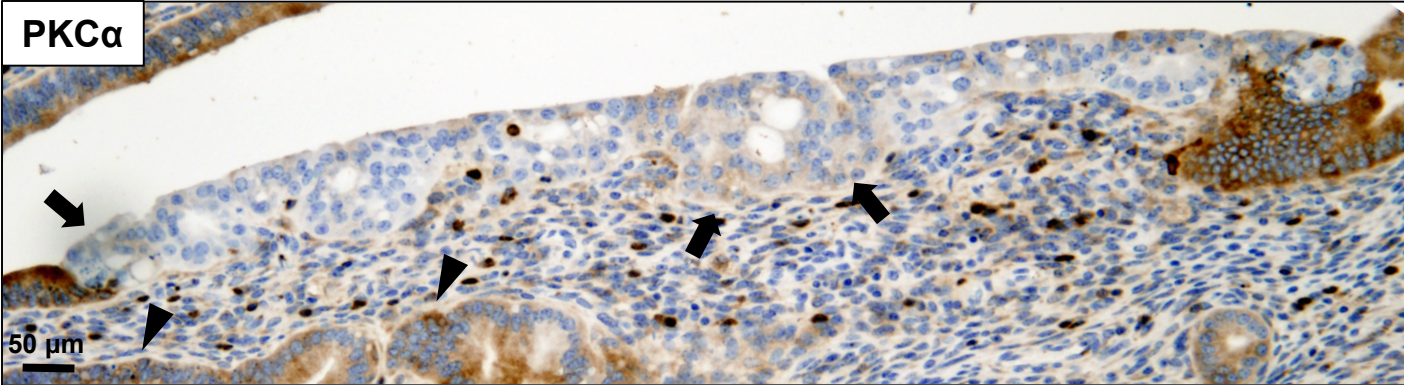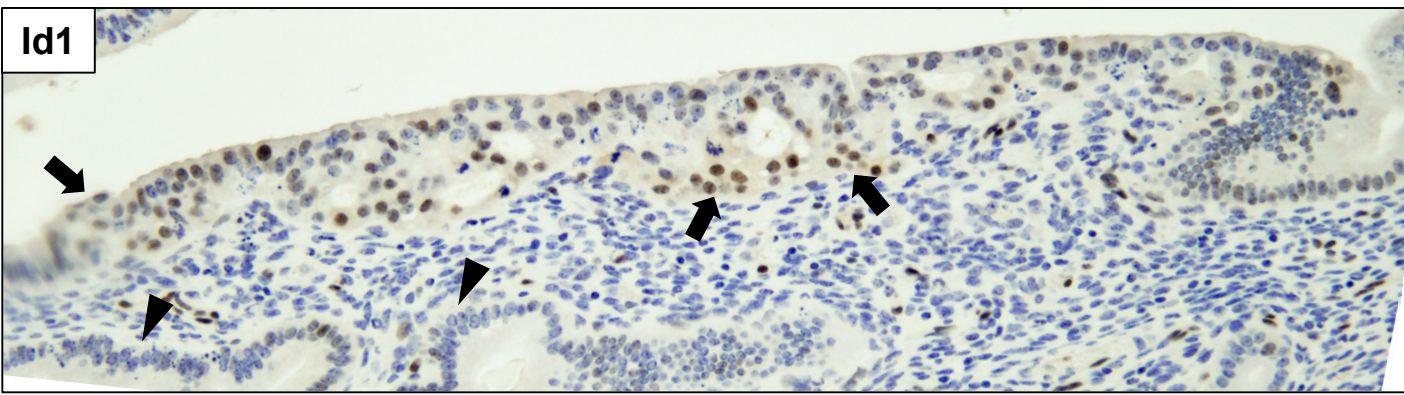

**Figure S5. Enhanced Id-1 expression in endometrial hyperplasia correlates with loss of PKC $\alpha$**  (related to Figures 2 and 5). IHC analysis of PKC $\alpha$  and Id1 expression in endometrium from *Pten*<sup>G129E/+</sup> and *Pten*<sup>C124R/+</sup> mice. Note the strong nuclear staining for Id-1 in hyperplastic regions that lack PKC $\alpha$  (arrows). Arrowheads indicate normal endometrial glands with high PKC $\alpha$  and low Id1 expression.

A

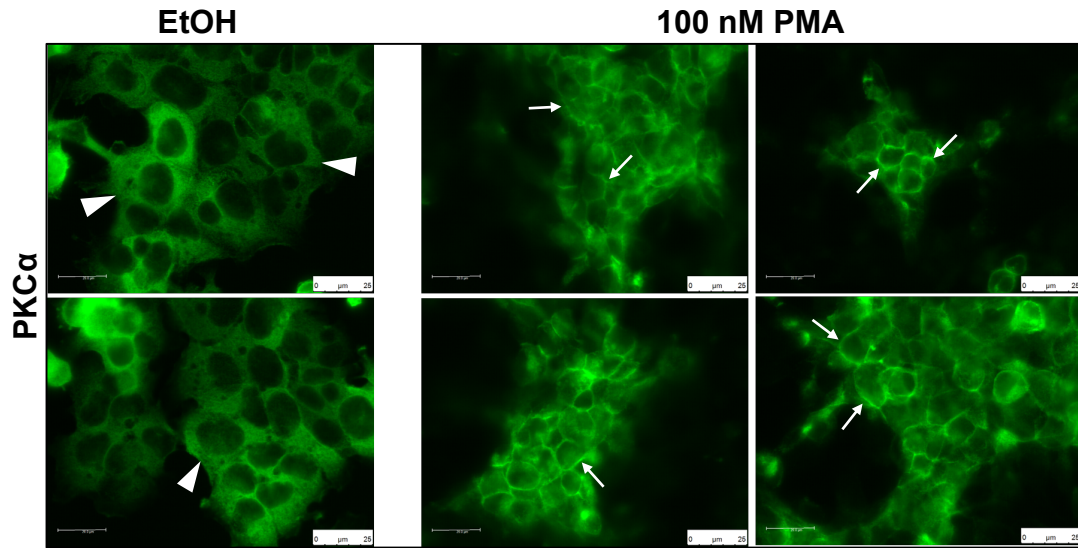

B

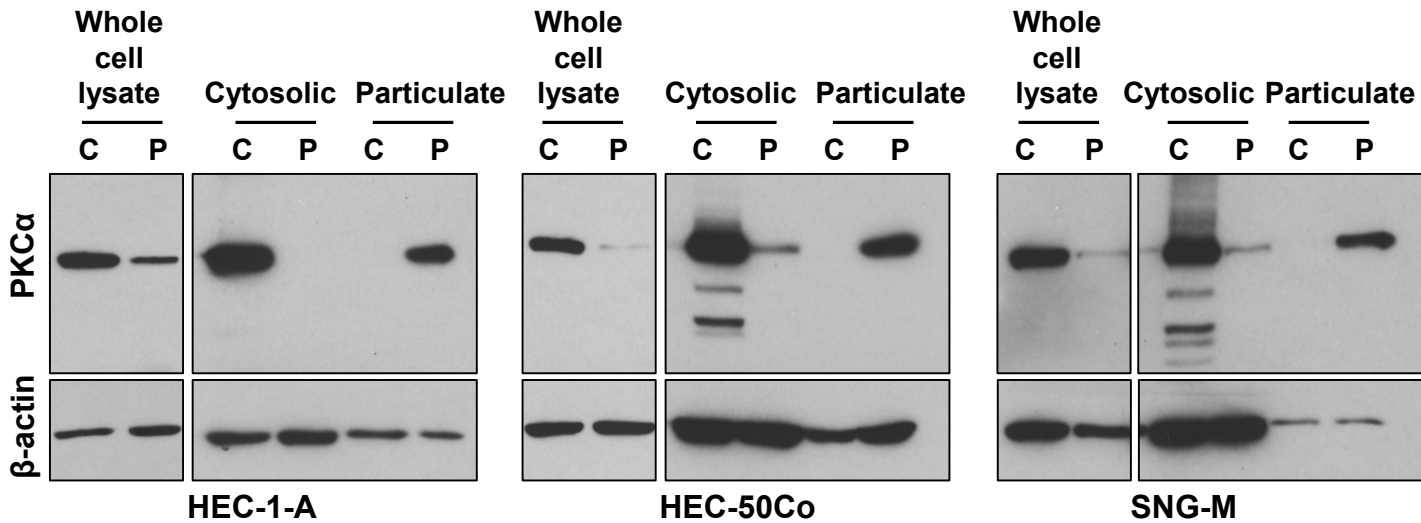

**Figure S6. PKC $\alpha$  activation under PMA stimulation (related to Figure 5).**

(A) Immunofluorescence images displaying diffuse PKC $\alpha$  staining in the cytoplasm at steady state (left panel) and membrane-associated PKC $\alpha$  (right panel), which is indicative of its activation, when endometrial cancer cells (HEC-1-A) are treated with 100 nM PMA for 6 hr. (B) Immunoblot analysis demonstrating the redistribution of PKC $\alpha$  from the cytosolic to the particulate fraction (right panels) following PMA-induced activation. Although total levels of PKC $\alpha$  are markedly downregulated after 6 hr of PMA treatment (left panels), significant levels of the enzyme persist in the particulate fraction. This level of PKC $\alpha$  activity is sufficient to maintain suppression of AKT activity for 6 hr (see Figure 5).

**SUPPLEMENTAL TABLE**

Table S1. EC cell line PI3K/AKT pathway mutations (Related to Figure 1 and Figures 3-7)

| <b>Cell line</b> | <b>PTEN</b>                | <b>PIK3CA</b> | <b>PIK3R1</b>   |
|------------------|----------------------------|---------------|-----------------|
| HEC-1-A          | WT                         | G1049R        |                 |
| HEC-1-B          | WT                         | G1049R        |                 |
| HEC-50Co         | WT                         |               | E468InsGEYDRLYE |
| KLE              | WT                         |               |                 |
| AN3CA            | R130fs                     |               | R557_K561>Q     |
| Ishikawa         | V317fs; V290fs             |               | L570P           |
| RL95-2           | M134I; R173H; N323fs       | R386G         |                 |
| SNG-II           | K6fs                       |               |                 |
| SNG-M            | K164fs; V290fs             |               | R88Q            |
| HEC-6            | V85fs; V290fs              | R108H; C420fs |                 |
| HEC-59           | Y46H; R233X; P246L; L265fs | R38C          | K567E; S460fs   |
| HEC-108          | K6fs; E288fs               |               | A331V           |
| HEC-116          | R55_L70>S; R173C           | R88Q          |                 |
| HEC-151          | I33del; Y76fs              | C420R         |                 |
| HEC-251          | S10N; E299X                | M1043I        |                 |
| HEC-265          | L318fs                     |               | H180fs; Q586fs  |

Adapted from (Weigelt et al., 2013).



## SUPPLEMENTAL EXPERIMENTAL PROCEDURES

### Human Tissue Microarrays (TMAs)

Human endometrial cancer (EC) TMAs were generated by Dr. Carl Morrison at Ohio State University (OSU) and Roswell Park Cancer Institute (RPCI) (now known as Roswell Park Comprehensive Cancer Center). Two TMAs, displaying a total of 384 de-identified ECs (304 endometrioid and 80 non-endometrioid) were generated at OSU with OSU Institutional Review Board approval. All patients in the TMA were diagnosed with uterine malignancy between January 1, 1980 and July 31, 2003 at the Arthur James Cancer Hospital of the OSU Medical School. Specimens for controls within the TMA consisted of 37 secretory endometrium, 30 proliferative endometrium, as well as multiple cores of normal tissue from 10 different organs including heart, colon, kidney, adrenal, ovary, myometrium, brain, thyroid, lung, and prostate. A third EC TMA, consisting of 52 de-identified ECs (26 endometrioid and 26 non-endometrioid) was generated at RPCI (RPCI\_GYNca09) with RPCI Institutional Review Board approval. Cases were diagnosed at RPCI between 1992 and 2011. For any case with variation in grade or cytological atypia, TMA cores of the donor block were always taken from the areas of the highest-grade tumor. Matching frozen tissue was also available for all of the RPCI cases and was used for determination of PKC $\alpha$  mRNA levels. Scoring of IHC staining was performed by three independent examiners who were blind to sample information.

### Analysis of Publically Available Data Sets

Analysis of TCGA datasets consisting of 35 normal endometrial tissue samples and 546 primary endometrial tumors was performed using the University of Alabama at Birmingham interactive web portal (<http://ualcan.path.uab.edu/analysis.html>) (Chandrashekar et al., 2017). Patient survival analysis in correlation with PKC $\alpha$  expression was performed using the MDACC-endometrial-L3-S40 dataset, consisting of 244 endometrial tumors of which 80% were of the endometrioid subtype. Analysis of survival in relation to other PKC isozymes used both TCGA and TCGA datasets.

### Cell Lines and Reagents

Human EC cell lines with diverse genetic mutations were obtained from the following sources: HEC-1-A, HEC-1-B, KLE, AN3CA, and RL95-2 from ATCC; Ishikawa from Dr. Tim Hui-Ming Huang (Ohio State University); HEC-50Co from Dr. Kimberly K. Leslie (University of Iowa); SNG-II, SNG-M, HEC-6, HEC-59, HEC-108, HEC-116, HEC-151, HEC-251, and HEC-265 cells from the Japanese Collection of Research Bioresources (JCRB) Cell Bank. All cells were maintained in culture conditions recommended by the providing source. PKC isozymes were activated with 100 nM phorbol 12-myristate 13-acetate (PMA; Biomol) dissolved in ethanol or with 20  $\mu$ g/ml 1,2-dioctanoyl-*sn*-glycerol (DiC<sub>8</sub>; Cayman Chemical) dissolved in acetonitrile. Because of its rapid metabolism in cells, DiC<sub>8</sub> was replaced every 30 minutes during the treatment period. Classical PKCs were inhibited with 2.5  $\mu$ M Gö6976 (EMD Millipore) dissolved in ethanol. PI3K was inhibited with LY294002 (40  $\mu$ M; Cell Signaling) and AKT was inhibited with MK-2206 (100 or 250 nM; Merck and Co., Inc.) dissolved in DMSO. Phosphatase inhibitors dissolved in DMSO were used as follows: calyculin A (10 nM; Santa Cruz); okadaic acid (1  $\mu$ M; Santa Cruz); NSC45586 and NSC117079 (50  $\mu$ M; NCI). All inhibitors were added to cells 30 minutes prior to addition of PKC agonists, except for calyculin A, which was added 15 minutes prior to PKC activation. An equal volume of vehicle was added to controls.

### Stable Transfection of Cell Lines

EC cell lines stably expressing either constitutively active phosphomimetic T308D/S473D mutant AKT1 (AKT-DD) (Alessi et al., 1996) or E17K mutant AKT1 (AKT-E17K) (Carpten et al., 2007) were generated via retroviral transduction. pBMN-AKT-DD was generated by subcloning AKT-DD (BamHI/XhoI) from pEGFP-Akt-DD (a gift from Dr. Julian Downward, Addgene plasmid # 39536; Watton and Downward, 1999) into the NotI/SalI sites of pBMN-I-GFP (a gift from Dr. Garry Nolan, Addgene plasmid # 1736). pBabe-puro-AKT-E17K was generated by site directed mutagenesis (QuikChange) of pBabe-puro-Akt1 (a gift from Dr. X. Wang, Roswell Park Comprehensive Cancer Center, and Q. She, University of Kentucky; Fan et al., 2013) using primers CAGGTCTTGATGTACTTCCCTCGTTTGTGCAGC and GCTGCACAAACGAGGGAAGTACATCAAGACCTG. Retroviral vectors pseudotyped with VSV-G were packaged in 293GP cells and EC cells were transduced (3X) with AKT mutant or empty vector (control) in the presence of 8  $\mu$ g/ml polybrene as described (Yee et al., 1994). Transduced cells were selected with 600  $\mu$ g/ml G418 (pBMN-I-GFP or pBMN-I-GFP-AKT-DD) or 10 $\mu$ g/ml puromycin (pBabe-puro and pBabe-AKT-E17K) and stable cell lines were transduced with Ad-PKC $\alpha$  or LacZ and used for soft agarose colony formation assays as described below. Dr. J.C. Krapinski (McMaster University) kindly provided pLHCX-HA-CA-AKT, which was used in initial exploratory experiments that are not shown.

## Mice

To generate PTEN mutant mice lacking PKC $\alpha$ , SV126/C57 BL6 *Prkca*<sup>-/-</sup> mice (Hao et al., 2011) were crossed with mixed strains of *Pten*<sup>44-5/+</sup> mice (Wang et al., 2010), to generate *Prkca*<sup>+/-</sup>; *Pten*<sup>44-5/+</sup> mice. These mice were then intercrossed to generate *Prkca*<sup>-/-</sup>; *Pten*<sup>44-5/+</sup> and *Prkca*<sup>+/-</sup>; *Pten*<sup>44-5/+</sup> mice. Mouse genotypes were determined by PCR reactions using the following primers:

For *Prkca*:

Primer 1 5'-CCAAGTGTGAAGTGTGTGAG-3'

Primer 2 5'-AGCTAGGTCCTGTTGGTAAC-3'

Primer 3 5'-GCGCATCGCCTTCTTCGC-3'

For *Pten*:

CoA 5'-GAATGCCATTACCTAGTAAAGCAAGG-3'

CoB 5'-GGGTTACTACTAACTAAACGAGTCC-3'

CoC 5'-GAATGATAATAGTACCTACTTCAG-3'

## Immunohistochemistry

Murine uterine tissue was formalin-fixed, paraffin-embedded, and 4  $\mu$ m cross- or longitudinal sections were prepared. Sections were deparaffinized in xylene and rehydrated by incubation in serially diluted alcohol. Antigen retrieval used DAKO Targeting Retrieval Solution (DAKO S1699) for 30 minutes in a steamer. Sections were blocked with 0.03% casein for 30 minutes at room temperature before incubation with primary antibody at 4°C overnight for anti-PKC $\alpha$  (1:3000-6000; Abcam 32376), anti-PTEN (1:100; Cell Signaling 9559), and anti-Id-1 (1:1200; Biocheck), or at room temperature for 1 h for anti-pAKT Ser473 (1:300-600; Cell Signaling 4060). Following washes, incubation with secondary antibody (Vector BA-1000) was performed at room temperature for 30 minutes, followed by washes and addition of Vectastain Elite ABC reagent (Vector Laboratories) and DAB chromogen solution (DAB Quanto; Thermo Scientific TA-060-QHDX). Sections were counterstained with hematoxylin. Immunostaining was performed using well-established IHC protocols and validated antibodies. PKC $\alpha$  and Id-1 were detected as described in (Hao et al., 2011), and pAKT Ser473 and PTEN IHC followed procedures detailed in (Wang et al., 2010). PKC $\alpha$  immunostaining specificity was further confirmed using PKC $\alpha$  knockout uterine tissue.

## Immunofluorescence

Uterine tissue was collected and immediately frozen in OCT. Frozen sections (4-10  $\mu$ m) were fixed in 2% freshly depolymerized paraformaldehyde/PBS for 15 minutes at room temperature and 100% methanol for 10 minutes at -20°C, prior to blocking with 0.03% casein and antibody incubation. Antibodies were as follows: anti-PKC $\alpha$  (1:250; Abcam 32376), anti-pAKT (1:200; Cell Signaling 4060), anti-rabbit Alexa 594 (1:300; Invitrogen A-21207), and anti-rabbit Alexa 488 (1:800; Invitrogen A-21206). Nuclei were stained with Hoechst dye (1:25) for 5 minutes. For analysis of PKC $\alpha$  localization in cell lines,  $1 \times 10^5$  cells were plated on coverslips, fixed in 2% formaldehyde and permeabilized in 100% cold methanol.

## Western Blotting

Cells were rinsed twice with PBS before lysis with 1% SDS, 10 mM Tris-HCl, pH 7.4. Cell lysates were centrifuged at  $\geq 12,000 \times g$  for 20 minutes and protein concentration was determined using the BCA Assay Kit (Pierce). Equal amounts of protein were subjected to SDS-PAGE and transferred to nitrocellulose membrane. Membranes were blocked with 5% milk and probed with primary antibodies as follows: anti-PTEN (1:1000-3000; Cell Signaling 9559), anti-pAKT Ser473 (1:10,000-30,000; Cell Signaling 4060), anti-pAKT Thr308 (1:8000-20,000; Cell Signaling 2965), anti-AKT (1:1000-5000; Cell Signaling 9272), anti-pPRAS40 (1:15,000-20,000; Cell Signaling 13175), anti-PRAS40 (1:10,000; Cell Signaling 2691), anti-pFOXO1 (1:1000; Cell Signaling 9401), anti-FOXO1 (1:1000; Cell Signaling 2880), anti-PKC $\alpha$  (1:10,000-20,000; Abcam 32376), anti-PKC $\beta$ I (1:2000; Abcam 195039), anti-PKC $\beta$ II (1:1000; SC-210), anti-PKC $\gamma$  (1:1000; SC-211), anti-PKC $\delta$  (1:1000; SC-213), anti-PKC $\epsilon$  (1:1000; SC-214), anti-PKC $\theta$  (1:1000; BD trans 610084), anti-PKC $\eta$  (1:500; SC-215), anti-PKC $\zeta$  (1:8000; SC-216), anti-PKC $\iota$  (1:1000; BD trans 610175), anti-PP2AC (1:3000; Millipore, Clone 1D6), anti-Id-1 (1:1500-3000; Biocheck), and anti- $\beta$ -actin (1:15,000; Sigma). Secondary antibodies were horseradish peroxidase-conjugated anti-rabbit or anti-mouse IgG (1:2000) and detection used SuperSignal West (Pierce). Signal intensity was quantified using ImageJ Software (NIH).

### **qRT-PCR Analysis**

RNA was isolated using RNAspin mini RNA isolation kit (GE Health) or Trizol reagent (Thermo Fisher) and 10 ng total cellular RNA was analyzed using Brilliant II SYBR® Green QRT-PCR 1-Step Master Mix (Agilent). The primers used for each target were as follows.

PKC $\alpha$ : 5'-GGAAGGGGACGAGGAAGGA-3', 5'-TGATGACTTTGTTGCCAGCAG-3';  
PHLPP1: 5'-TGATGACTTTGTTGCCAGCAG-3', 5'-AGTTCATTAAGCCCCCTGGC-3';  
PHLPP2: 5'-TGTACGCAAGGGAAAGACCC-3', 5'-AGCAAGGGAGTATTGCCGTC-3';  
18s rRNA: 5'-CATTGGAGGGCAAGTCTGGTG-3', 5'-CTCCAAGCTCCAACACTACGAG-3';  
GAPDH: 5'-TGAAGGTCGGAGTCAACGGA-3', 5'-CCATTGATGACAAGCTTCCCCG-3'

### **Laser Capture Microdissection (LCM)**

Longitudinal sections (10  $\mu$ M) of frozen tissue (in OCT compound) were thaw-mounted onto PET-membrane FrameSlides (Leica). Slides were air-dried briefly and fixed in 70% EtOH for 30 seconds, washed in dH<sub>2</sub>O to remove excess OCT, stained with hematoxylin until tissue was visible, rinsed in dH<sub>2</sub>O, and incubated in 95% and 100% EtOH for 30 seconds. LCM was performed using a Leica LMD 6500 Laser Microdissection System. Collection of normal endometrial epithelium and hyperplastic lesions was guided by immunofluorescence analysis of PKC $\alpha$  and pAKT Ser473 expression on adjacent sections. Microdissected tissue was directly collected into lysis buffer and RNA was isolated using the RNAqueous-MicroKit (Ambion).

### **Subcellular Fractionation**

Cytosolic and particulate fractions were prepared from endometrial cancer cells and an equal proportion of each fraction was analyzed for PKC $\alpha$  expression as described (Frey et al., 1997).

### **Correlation between PKC $\alpha$ mRNA and Protein Levels in EC Tissues and Cell Lines**

To perform parallel analysis of PKC $\alpha$  mRNA and protein levels in EC tumors, total RNA was isolated from frozen samples of 52 of the tumors included in the TMA. PKC $\alpha$  mRNA levels were measured by qRT-PCR. A score was given to the tumors based on PKC $\alpha$  signal intensity from the IHC analysis. Results from the mRNA analysis were paired with the corresponding IHC score for the 52 tumors. The correlation between PKC $\alpha$  mRNA and protein levels was determined by Spearman Rank Correlation analysis.

### **Quantification of Tumor Burden and pAKT Intensity Relative to PKC $\alpha$ Expression**

For quantification of uterine tumor burden in mice, two to four longitudinal sections per animal were stained for pAKT Ser473 to identify endometrial lesions (Wang et al., 2002) and positive signal was quantified using DEFINIENS software and expressed relative to total endometrial epithelium area (as %).

For determination of pAKT intensity relative to PKC $\alpha$  expression, pAKT staining on each slide was stratified as negative-low, medium and high without knowledge of corresponding PKC $\alpha$  staining. Analysis was performed using Adobe Photoshop CC. pAKT staining was abstracted from the image using the Color Range tool and copied to a separate layer. Thresholds corresponding to the boundaries between staining levels were set and used to trace areas corresponding to each level. Areas of positivity on slides probed for PKC $\alpha$  were similarly identified and abstracted to a separate layer without reference to pAKT staining. Layers from consecutive slides stained for PKC $\alpha$  and pAKT were overlaid and the area (in pixels) corresponding to each level of pAKT staining in PKC $\alpha$  positive and PKC $\alpha$  negative areas was determined.

### **Analysis of Nascent RNA**

Labeling and capture of nascent RNA were performed using the Click-iT Nascent RNA Capture Kit (Life Technologies) according to the manufacturer's protocol. Biotinylated RNA was captured using Streptavidin magnetic beads and cDNA was generated using the iScript cDNA Synthesis Kit (Bio-Rad). cDNA for PKC $\alpha$  and GAPDH was quantified by qPCR using iTaq Universal SYBR Green Supermix.

### **RNA Interference**

Lentiviral transduction of cells with PTEN shRNA (clones V2LHS\_92317 and/or V2LHS\_231477; Open Biosystems) or a non-targeting (nt) shRNA (RHS4348) was at a multiplicity of infection (moi) of 20 in serum-free medium containing 8  $\mu$ g/ml of polybrene. Cells were incubated with lentivirus for 8 hours at 37°C before the addition of serum-containing culture medium. Four days after transduction, cells were continuously selected with puromycin (10  $\mu$ g/ml)

prior to use in experiments. For siRNA-mediated knockdown of PKC $\alpha$ , cells were transfected with 10 nM siRNA using RNAiMAX transfection reagent (Invitrogen) and analyzed after 48-72 h. siRNAs were as follows: PKC $\alpha$  siRNA 1 – 5'-GGAUUGUUCUUUCUUCUATT-3' (Ambion Life Technologies); PKC $\alpha$  siRNA 2 – 5'-GAAGGGUUCUCGUAUGUCATT-3' (Ambion Life Technologies); Non-targeting siRNA #1 D-001810-01-05 (Dharmacon).

### **PP2A Activity Assay**

Cells were treated with PMA or vehicle control for 10 minutes and PP2A activity in cell extracts was measured using a PP2A Immunoprecipitation Phosphatase Assay Kit (Millipore) as previously described (Guan et al., 2007), except that 0.5% Ipegal CA-630 was included in the lysis buffer.

### **Adenoviral-mediated Protein Expression and Soft Agarose Colony Formation Assay**

Adenoviral vectors expressing either LacZ (control), PKC $\alpha$ , or kinase-dead PKC $\alpha$  were amplified in HEK293 packaging cells and the titer of viral supernatants was determined using Adeno-X Rapid Titer Kit (Clontech). Adenovirus expressing myr-AKT1 or PTEN was purchased from Vector Biolabs. Cells ( $5 \times 10^5$ ) were transduced with adenovirus in reduced (2%) serum medium for 24 hours and then incubated in complete culture medium for 24 h prior to drug treatment and Western blot analysis as described in previous sections. Alternatively,  $1-5 \times 10^3$  cells per well were plated in 0.6% low-melting agarose in duplicate as described (Pysz et al., 2009). Ad-LacZ was used as a control for adenoviral protein expression. Colonies were allowed to grow for 1-4 weeks prior to staining with crystal violet. Whole plates were then scanned and visible colonies were counted. Alternatively, images from 4 independent fields per well were taken at 5X magnification at 4 different focal planes. Images of colonies from each focal plane were selected and superimposed using the magic wand tool in Adobe Photoshop CC software. The number of colonies per field was determined using the Particle Analysis Tool in Image J Software (NIH).

## **SUPPLEMENTAL REFERENCES**

Alessi, D.R., Andjelkovic, M., Caudwell, B., Cron, P., Morrice, N., Cohen, P., and Hemmings, B.A. (1996). Mechanism of activation of protein kinase B by insulin and IGF-1. *The EMBO Journal* *15*, 6541-6551.

Byers, S.L., Wiles, M.V., Dunn, S.L., and Taft, R.A. (2012). Mouse estrous cycle identification tool and images. *PLoS One* *7*, e35538.

Carpten, J.D., Faber, A.L., Horn, C., Donoho, G.P., Briggs, S.L., Robbins, C.M., Hostetter, G., Boguslawski, S., Moses, T.Y., Savage, S., *et al.* (2007). A transforming mutation in the pleckstrin homology domain of AKT1 in cancer. *Nature* *448*, 439.

Chandrashekar, D.S., Bachel, B., Balasubramanya, S.A.H., Creighton, C.J., Ponce-Rodriguez, I., Chakravarthi, B.V.S.K., and Varambally, S. (2017). UALCAN: A Portal for Facilitating Tumor Subgroup Gene Expression and Survival Analyses. *Neoplasia* *19*, 649-658.

Daikoku, T., Hirota, Y., Tranguch, S., Joshi, A.R., DeMayo, F.J., Lydon, J.P., Ellenson, L.H., and Dey, S.K. (2008). Conditional loss of uterine Pten unfailingly and rapidly induces endometrial cancer in mice. *Cancer Res.* *68*, 5619-5627.

Daikoku, T., Ogawa, Y., Terakawa, J., Ogawa, A., DeFalco, T., and Dey, S.K. (2014). Lactoferrin-iCre: A New Mouse Line to Study Uterine Epithelial Gene Function. *Endocrinology* *155*, 2718-2724.

Fan, C.-D., Lum, M.A., Xu, C., Black, J.D., and Wang, X. (2013). Ubiquitin-dependent Regulation of Phospho-AKT Dynamics by the Ubiquitin E3 Ligase, NEDD4-1, in the Insulin-like Growth Factor-1 Response. *J. Biol. Chem.* *288*, 1674-1684.

Frey, M.R., Saxon, M.L., Zhao, X., Rollins, A., Evans, S.S., and Black, J.D. (1997). Protein kinase C isozyme-mediated cell cycle arrest involves induction of p21(waf1/cip1) and p27(kip1) and hypophosphorylation of the retinoblastoma protein in intestinal epithelial cells. *J. Biol. Chem.* *272*, 9424-9435.

Guan, L., Song, K., Pysz, M.A., Curry, K.J., Hizli, A.A., Danielpour, D., Black, A.R., and Black, J.D. (2007). Protein kinase C-mediated down-regulation of cyclin D1 involves activation of the translational repressor 4E-BP1 via a phosphoinositide 3-kinase/Akt-independent, protein phosphatase 2A-dependent mechanism in intestinal epithelial cells. *J. Biol. Chem.* *282*, 14213-14225.



- Hao, F., Pysz, M.A., Curry, K.J., Haas, K.N., Seedhouse, S.J., Black, A.R., and Black, J.D. (2011). Protein kinase Calpha signaling regulates inhibitor of DNA binding 1 in the intestinal epithelium. *J. Biol. Chem.* *286*, 18104-18117.
- Pysz, M.A., Leontieva, O.V., Bateman, N.W., Uronis, J.M., Curry, K.J., Threadgill, D.W., Janssen, K.P., Robine, S., Velcich, A., Augenlicht, L.H., *et al.* (2009). PKCalpha tumor suppression in the intestine is associated with transcriptional and translational inhibition of cyclin D1. *Exp. Cell. Res.* *315*, 1415-1428.
- Wang, H., Douglas, W., Lia, M., Edelmann, W., Kucherlapati, R., Podsypanina, K., Parsons, R., and Ellenson, L.H. (2002). DNA mismatch repair deficiency accelerates endometrial tumorigenesis in Pten heterozygous mice. *Am. J. Pathol.* *160*, 1481-1486.
- Wang, H., Karikomi, M., Naidu, S., Rajmohan, R., Caserta, E., Chen, H.Z., Rawahneh, M., Moffitt, J., Stephens, J.A., Fernandez, S.A., *et al.* (2010). Allele-specific tumor spectrum in pten knockin mice. *Proc. Natl. Acad. Sci. USA.* *107*, 5142-5147.
- Watton, S.J., and Downward, J. (1999). Akt/PKB localisation and 3' phosphoinositide generation at sites of epithelial cell-matrix and cell-cell interaction. *Current biology : CB* *9*, 433-436.
- Weigelt, B., Warne, P.H., Lambros, M.B., Reis-Filho, J.S., and Downward, J. (2013). PI3K pathway dependencies in endometrioid endometrial cancer cell lines. *Clin. Cancer. Res.* *19*, 3533-3544.
- Yee, J.K., Miyanohara, A., LaPorte, P., Bouic, K., Burns, J.C., and Friedmann, T. (1994). A general method for the generation of high-titer, pantropic retroviral vectors: highly efficient infection of primary hepatocytes. *Proc Natl Acad Sci U S A* *91*, 9564-9568.
